# Supplementary material for: Noninnocence of the deprotonated 1,2-bis((1H-pyrrol-2-yl)methylene)hydrazine bridge in diruthenium frameworks – a function of co-ligands
Source: Royal Society of Chemistry journal article supplement (doi:10.1039/d1dt01488a), 2021-01-01

**Supporting Information**

**Noninnocence of deprotonated 1,2-bis((1H-pyrrol-2-yl)methylene)  
hydrazine bridge in diruthenium frameworks-a function of co-ligands**

Maya Kumari, Sudip Kumar Bera and Goutam Kumar Lahiri\*

*Department of Chemistry, Indian Institute of Technology Bombay, Powai, Mumbai-400076,*

*India, E-mail: [lahiri@chem.iitb.ac.in](mailto:lahiri@chem.iitb.ac.in)*

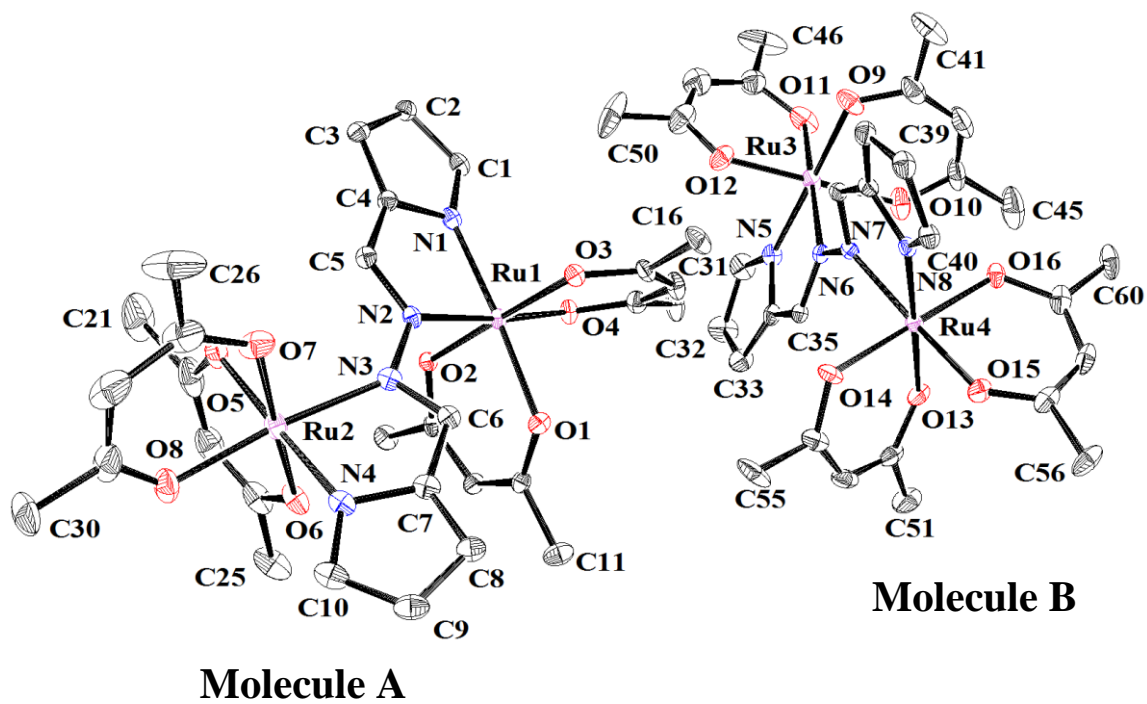

**Fig. S1** ORTEP of the asymmetric unit of **1a** consisting of two independent molecules.

Ellipsoids are drawn at 20% probability level. Hydrogen atoms are omitted for clarity.

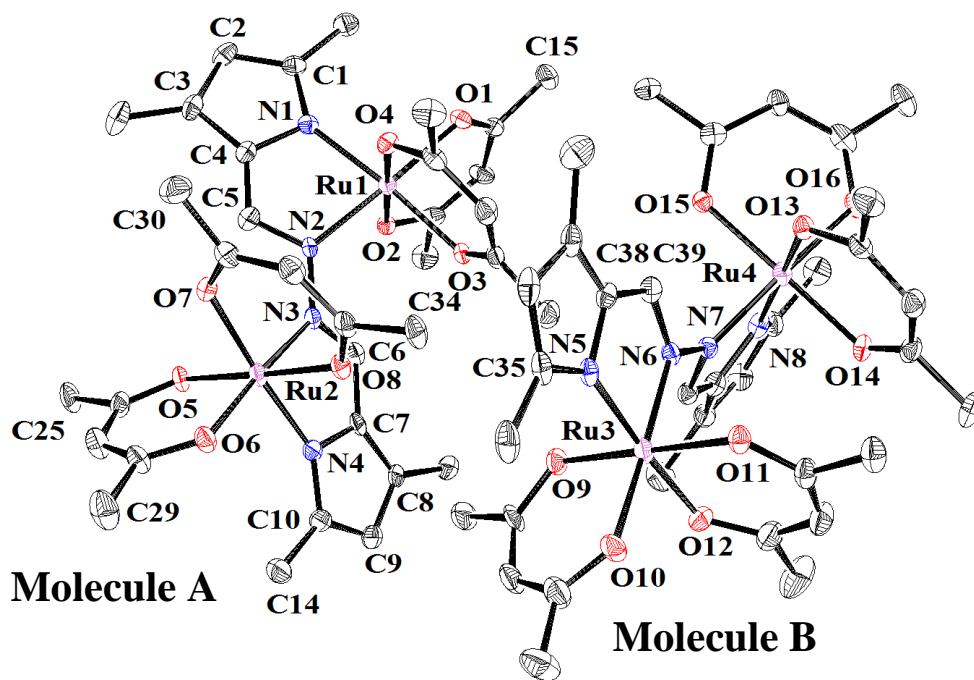

**Fig. S2** ORTEP of the asymmetric unit of **1b** consisting of two independent molecules.

Ellipsoids are drawn at 20% probability level. Hydrogen atoms are omitted for clarity.

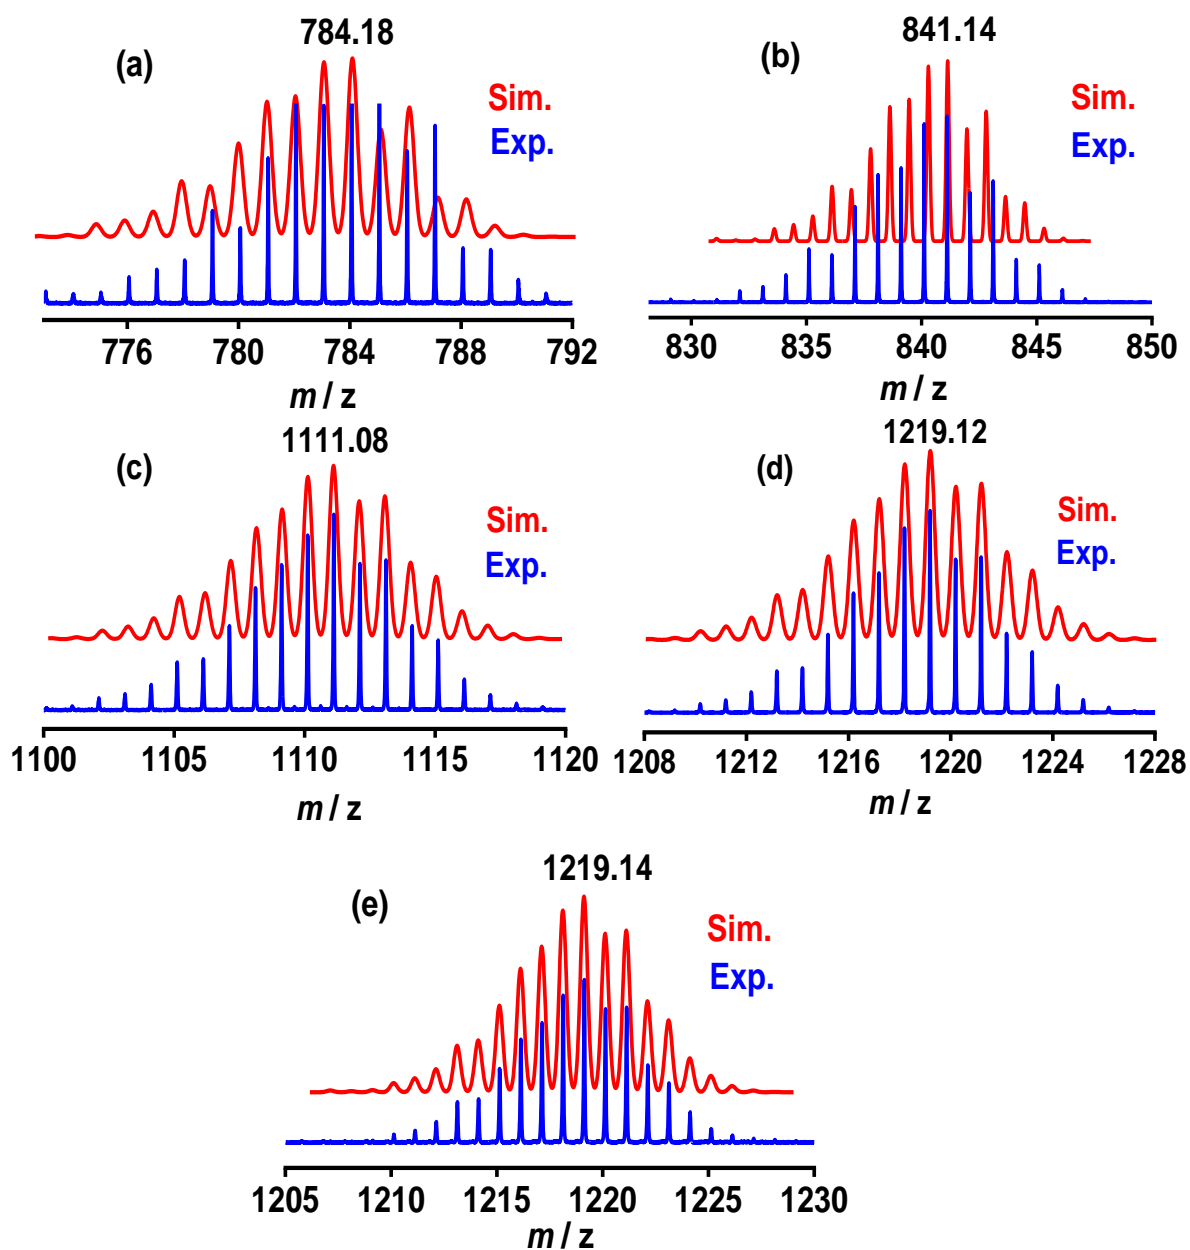

**Fig. S3** ESI(+) mass spectra of (a)  $\{1a+H\}^+$ , (b)  $\{1b+H\}^+$ , (c)  $\{[2](ClO_4)_2-ClO_4\}^+$ , (d)  $\{[3a](ClO_4)_2-ClO_4\}^+$  and (e)  $\{[3b](ClO_4)_2-ClO_4\}^+$  in  $CH_3CN$ .

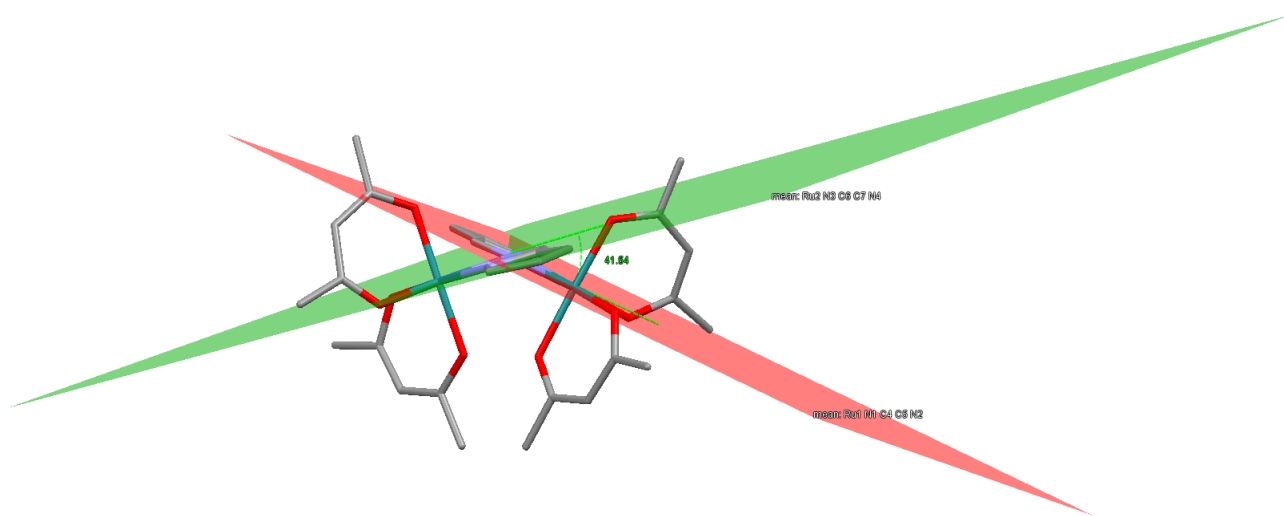

**Fig. S4** Torsional angle (deg) between the planes for **1a**.

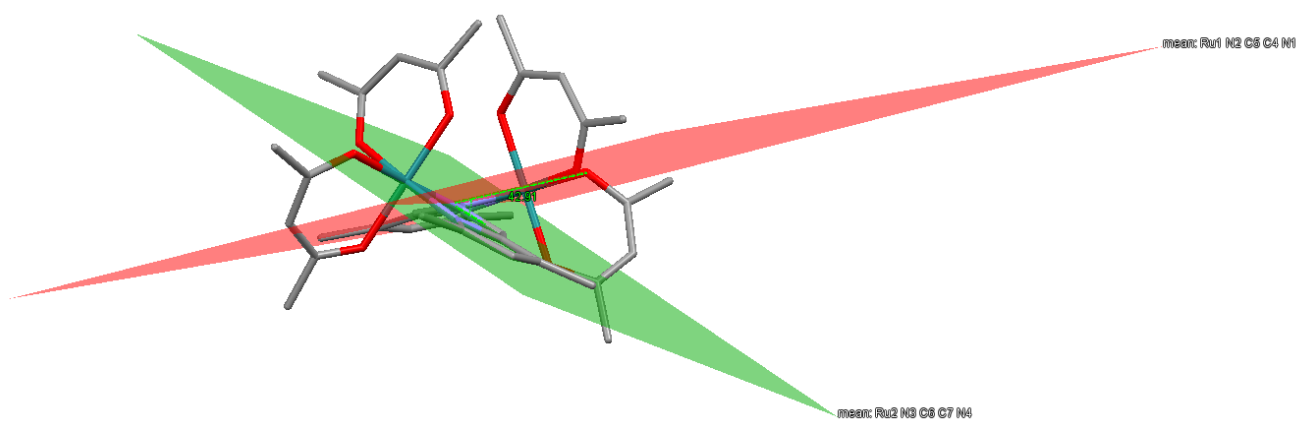

**Fig. S5** Torsional angle (deg) between the planes for **1b**.

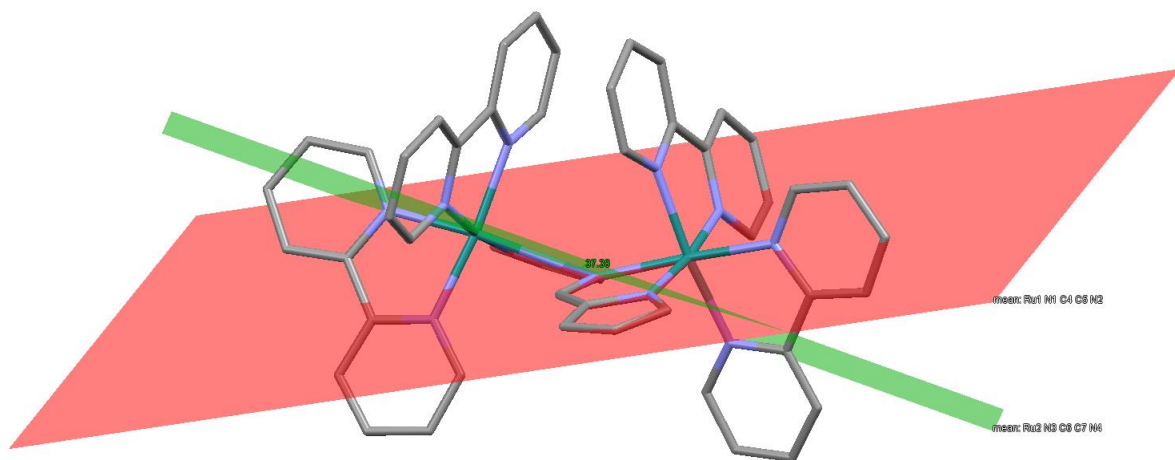

**Fig. S6** Torsional angle (deg) between the planes for  $[2]^{2+}$ .

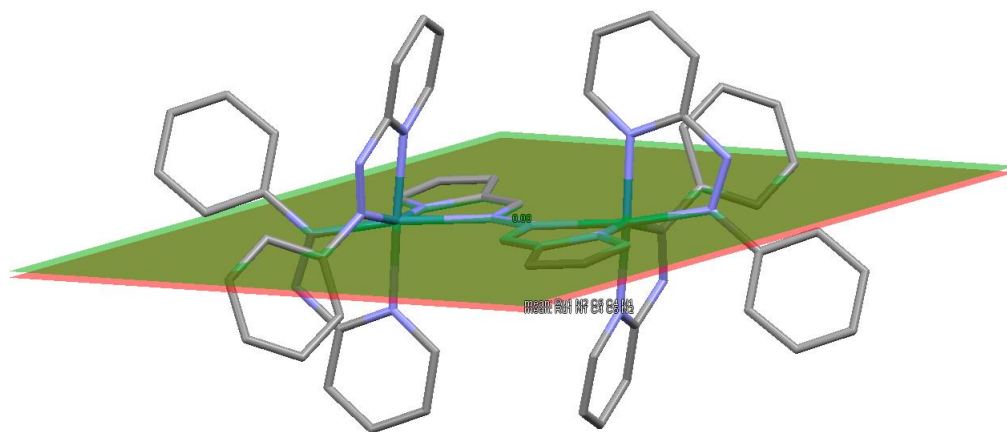

**Fig. S7** Torsional angle (deg) between the planes for  $[3a]^{2+}$ .



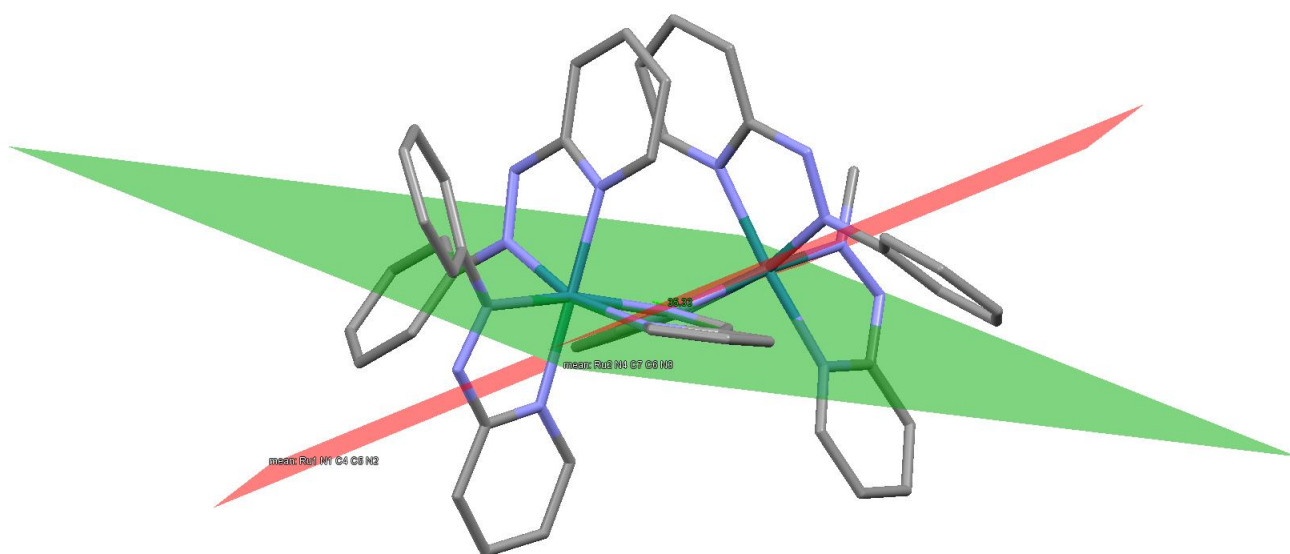

**Fig. S8** Torsional angle (deg) between the planes for  $[3b]^{2+}$ .

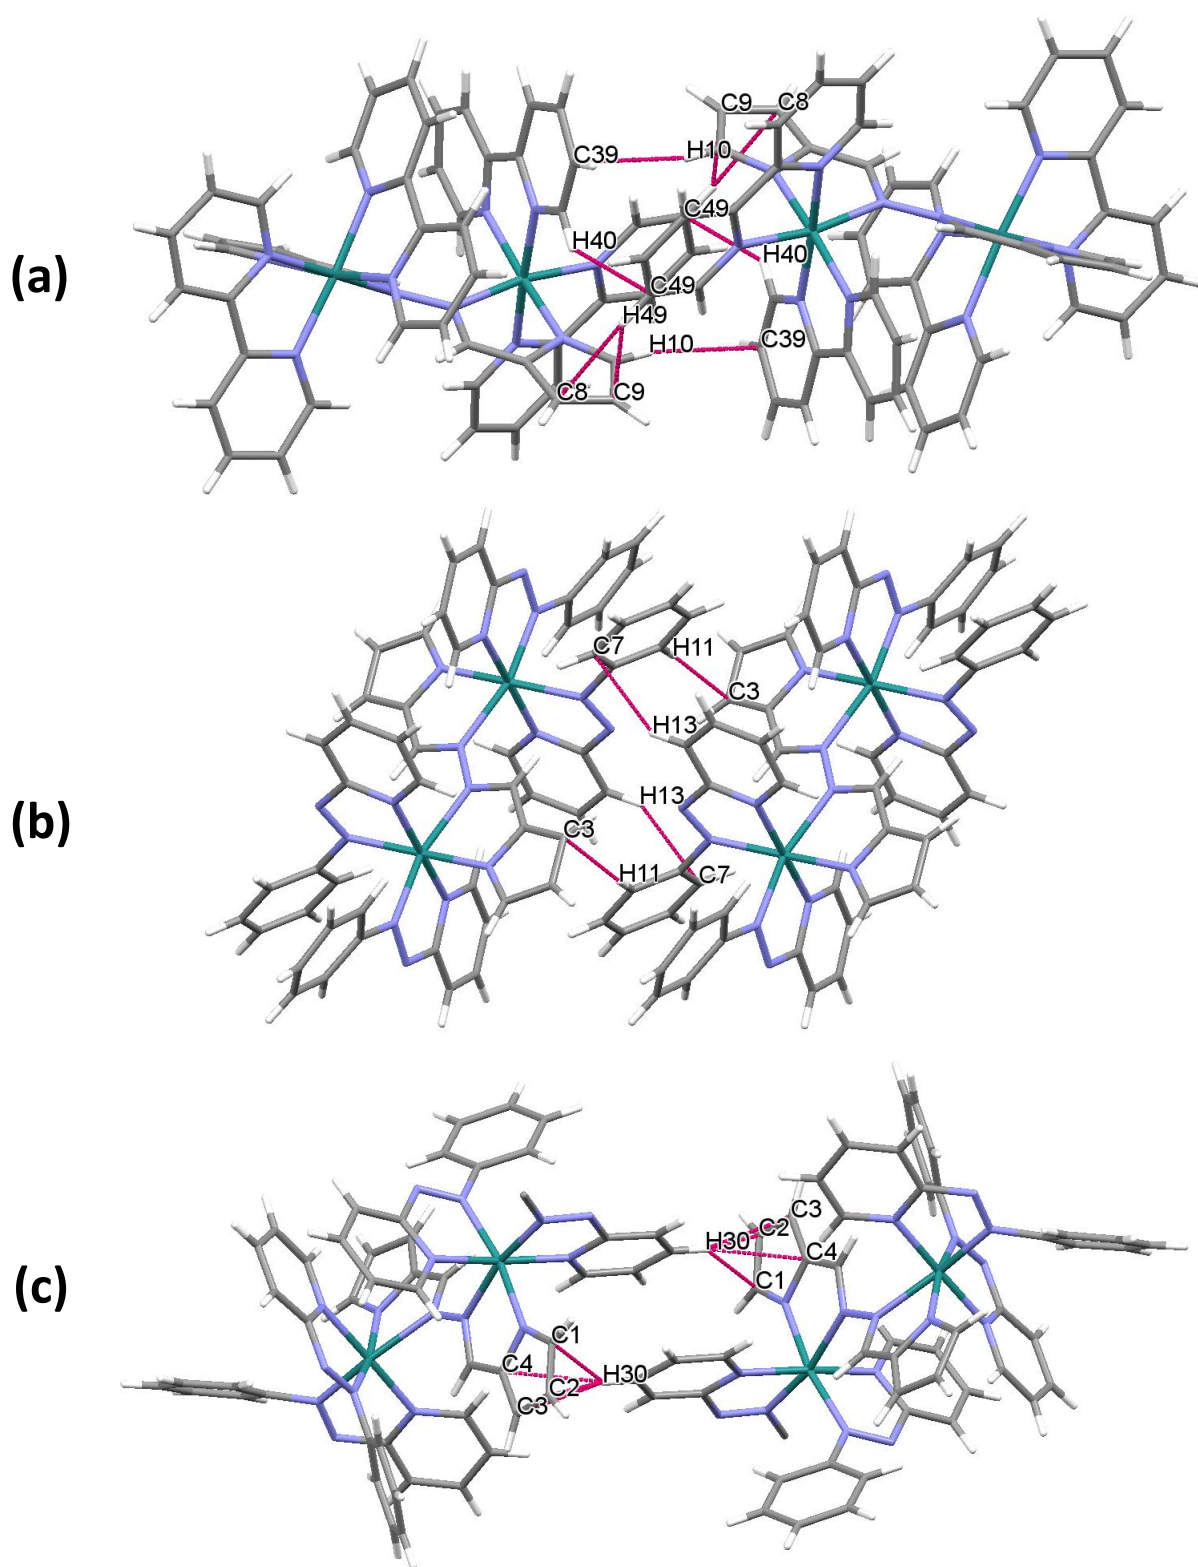

**Fig. S9** C-H... $\pi$  interactions in the crystals of (a) **[2]**(ClO<sub>4</sub>)<sub>2</sub>, (b) **[3a]**(ClO<sub>4</sub>)<sub>2</sub> and (c) **[3b]**(ClO<sub>4</sub>)<sub>2</sub>.

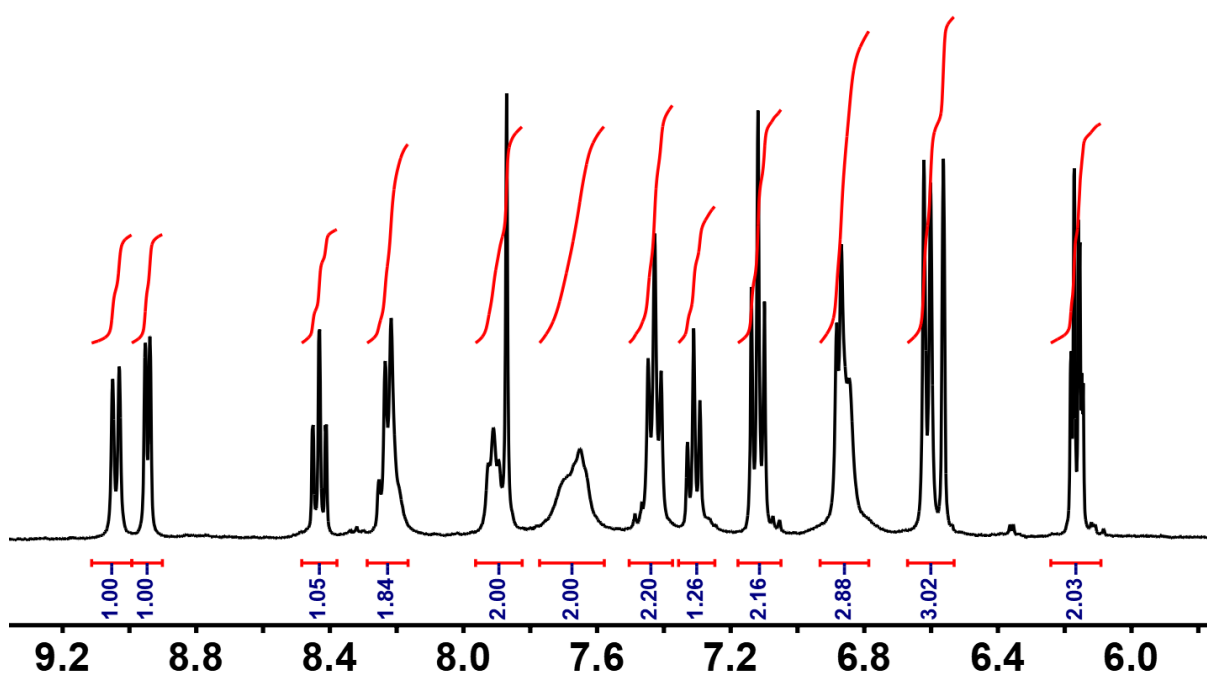

**Fig. S10** Integrated <sup>1</sup>H NMR spectrum of **[3a](ClO<sub>4</sub>)<sub>2</sub>** in (CD<sub>3</sub>)<sub>2</sub>SO<sub>3</sub> with TMS ( $\delta = 0$  ppm) as an internal standard.

**Table S1** Selected crystallographic parameters

| Complex                                               | <b>1a</b> (molecule A)                                                            | <b>1b</b> (molecule A)                                                            | <b>[2](ClO<sub>4</sub>)<sub>2</sub>•CH<sub>2</sub>Cl<sub>2</sub></b>                           | <b>[3a](ClO<sub>4</sub>)<sub>2</sub></b>                           | <b>[3b](ClO<sub>4</sub>)<sub>2</sub>•CH<sub>3</sub>OH</b>                                          |
|-------------------------------------------------------|-----------------------------------------------------------------------------------|-----------------------------------------------------------------------------------|------------------------------------------------------------------------------------------------|--------------------------------------------------------------------|----------------------------------------------------------------------------------------------------|
| empirical formula                                     | 2(C <sub>30</sub> H <sub>36</sub> N <sub>4</sub> O <sub>8</sub> Ru <sub>2</sub> ) | 2(C <sub>34</sub> H <sub>45</sub> N <sub>4</sub> O <sub>8</sub> Ru <sub>2</sub> ) | C <sub>51</sub> H <sub>42</sub> Cl <sub>4</sub> N <sub>12</sub> O <sub>8</sub> Ru <sub>2</sub> | C <sub>27</sub> H <sub>22</sub> ClN <sub>8</sub> O <sub>4</sub> Ru | C <sub>53.7</sub> H <sub>46.7</sub> Cl <sub>2</sub> N <sub>16</sub> O <sub>9</sub> Ru <sub>2</sub> |
| formula weight                                        | 1563.57                                                                           | 1676.73                                                                           | 1294.90                                                                                        | 659.04                                                             | 1333.86                                                                                            |
| crystal system                                        | triclinic                                                                         | triclinic                                                                         | triclinic                                                                                      | triclinic                                                          | triclinic                                                                                          |
| space group                                           | <i>P</i> $\bar{1}$                                                                | <i>P</i> $\bar{1}$                                                                | <i>P</i> $\bar{1}$                                                                             | <i>P</i> $\bar{1}$                                                 | <i>P</i> $\bar{1}$                                                                                 |
| <i>a</i> (Å)                                          | 9.6955(5)                                                                         | 12.6118(9)                                                                        | 13.8250(3)                                                                                     | 9.3715(7)                                                          | 11.3064(2)                                                                                         |
| <i>b</i> (Å)                                          | 19.0317(9)                                                                        | 15.1919(12)                                                                       | 14.1090(3)                                                                                     | 12.8604(10)                                                        | 12.8799(3)                                                                                         |
| <i>c</i> (Å)                                          | 19.4285(6)                                                                        | 22.0273(17)                                                                       | 14.5097(3)                                                                                     | 14.0731(10)                                                        | 20.0088(4)                                                                                         |
| $\alpha$ (deg)                                        | 100.6410(10)                                                                      | 88.880(6)                                                                         | 82.406(2)                                                                                      | 65.971(7)                                                          | 82.3750(18)                                                                                        |
| $\beta$ (deg)                                         | 91.2890(10)                                                                       | 78.068(6)                                                                         | 87.564(2)                                                                                      | 75.515(6)                                                          | 80.6850(18)                                                                                        |
| $\gamma$ (deg)                                        | 104.4110(10)                                                                      | 84.835(6)                                                                         | 73.395(2)                                                                                      | 85.018(6)                                                          | 85.8215(18)                                                                                        |
| <i>V</i> (Å <sup>3</sup> )                            | 3403.6(3)                                                                         | 4112.4(5)                                                                         | 2688.37(10)                                                                                    | 1499.7(2)                                                          | 2846.00(11)                                                                                        |
| <i>Z</i>                                              | 2                                                                                 | 2                                                                                 | 2                                                                                              | 2                                                                  | 2                                                                                                  |
| $\mu$ (mm <sup>-1</sup> )                             | 0.937                                                                             | 0.782                                                                             | 0.826                                                                                          | 0.657                                                              | 0.695                                                                                              |
| <i>T</i> (K)                                          | 150(2)                                                                            | 150(2)                                                                            | 150(2)                                                                                         | 150(2)                                                             | 150(2)                                                                                             |
| $\rho_{\text{calcd}}$ (g cm <sup>-3</sup> )           | 1.526                                                                             | 1.354                                                                             | 1.600                                                                                          | 1.459                                                              | 1.557                                                                                              |
| F (000)                                               | 1582                                                                              | 1710                                                                              | 1304                                                                                           | 666                                                                | 1350.0                                                                                             |
| $\theta$ range (deg)                                  | 2.176 to 25                                                                       | 1.645 to 24.999                                                                   | 2.095, 24.999                                                                                  | 1.630 to 31.209                                                    | 2.382 to 25                                                                                        |
| data/restraints/parameters                            | 11114/ 24/809                                                                     | 14450/0/889                                                                       | 9481/30/785                                                                                    | 8746/0/370                                                         | 10012/79/761                                                                                       |
| R1, wR2 [ <i>I</i> > 2 $\sigma$ ( <i>I</i> )]         | 0.0668, 0.1743                                                                    | 0.0668, 0.1419                                                                    | 0.0331, 0.0758                                                                                 | 0.0487, 0.1201                                                     | 0.0624, 0.1608                                                                                     |
| R1, wR2(all data)                                     | 0.0823, 0.1872                                                                    | 0.1318, 0.1713                                                                    | 0.0396, 0.0803                                                                                 | 0.0650, 0.1302                                                     | 0.0702, 0.1682                                                                                     |
| <i>GOF</i> on <i>F</i> <sup>2</sup>                   | 1.022                                                                             | 0.947                                                                             | 1.066                                                                                          | 1.049                                                              | 1.042                                                                                              |
| largest difference in peak/hole, (e Å <sup>-3</sup> ) | 1.989 / -1.848                                                                    | 0.916 / -0.882                                                                    | 0.575 / -1.074                                                                                 | 0.94 / -1.24                                                       | 2.84/-1.26                                                                                         |

**Table S2** Selected bond distances (Å)

| Bond ( Å ) | <b>1a</b><br>(molecule A) |       | <b>1b</b><br>(molecule A) |       |
|------------|---------------------------|-------|---------------------------|-------|
|            | X-ray                     | DFT   | X-ray                     | DFT   |
| Ru1-N1     | 2.014(5)                  | 2.031 | 2.015(6)                  | 2.049 |
| Ru1-N2     | 2.056(5)                  | 2.099 | 2.017(6)                  | 2.090 |
| Ru1-O1     | 2.030(4)                  | 2.085 | 2.035(5)                  | 2.084 |
| Ru1-O2     | 2.004(4)                  | 2.045 | 1.988(5)                  | 2.046 |
| Ru1-O3     | 2.010(4)                  | 2.075 | 2.037(5)                  | 2.080 |
| Ru1-O4     | 2.009(4)                  | 2.042 | 1.997(5)                  | 2.045 |
| Ru2-N3     | 2.054(6)                  | 2.100 | 2.035(6)                  | 2.092 |
| Ru2-N4     | 2.000(6)                  | 2.030 | 2.016(6)                  | 2.047 |
| Ru2-O5     | 2.037(6)                  | 2.075 | 1.981(5)                  | 2.080 |
| Ru2-O6     | 1.991(5)                  | 2.042 | 2.031(5)                  | 2.044 |
| Ru2-O7     | 2.005(5)                  | 2.083 | 2.030(5)                  | 2.085 |
| Ru2-O8     | 2.029(5)                  | 2.046 | 1.997(5)                  | 2.046 |
| N2-N3      | 1.423(7)                  | 1.383 | 1.405(8)                  | 1.382 |
| N2-C5      | 1.296(8)                  | 1.317 | 1.307(9)                  | 1.320 |
| N3-C6      | 1.300(8)                  | 1.317 | 1.311(8)                  | 1.320 |
| C4-C5      | 1.417(9)                  | 1.409 | 1.380(10)                 | 1.402 |
| C6-C7      | 1.425(9)                  | 1.409 | 1.397(10)                 | 1.320 |
| Ru1···Ru2  | 4.935                     | 5.004 | 4.934                     | 4.975 |

**Table S3** Selected bond distances (Å)

| Bond distances (Å) | <b>1a</b> (molecule B) |       | <b>1b</b> (molecule B) |       |
|--------------------|------------------------|-------|------------------------|-------|
|                    | X-ray                  | DFT   | X-ray                  | DFT   |
| Ru3-N5             | 1.980(6)               | 2.001 | 2.007(6)               | 2.039 |
| Ru3-N6             | 2.050(5)               | 2.199 | 2.024(6)               | 2.076 |
| Ru4-N7             | 2.067(5)               | 2.105 | 2.023(6)               | 2.081 |
| Ru4-N8             | 1.995(5)               | 2.005 | 2.011(6)               | 2.046 |
| Ru3-O9             | 2.045(6)               | 2.085 | 1.996(5)               | 2.001 |
| Ru3-O10            | 1.986(6)               | 2.002 | 2.019(5)               | 2.055 |
| Ru3-O11            | 2.038(5)               | 2.120 | 2.004(5)               | 2.019 |
| Ru3-O12            | 2.002(6)               | 2.080 | 2.027(5)               | 2.077 |
| Ru4-O13            | 2.043(5)               | 2.071 | 2.040(5)               | 2.100 |
| Ru4-O14            | 1.996(5)               | 2.002 | 2.008(5)               | 2.014 |
| Ru4-O15            | 2.012(5)               | 2.093 | 2.000(5)               | 2.005 |
| Ru4-O16            | 1.999(5)               | 2.000 | 2.024(5)               | 2.086 |
| N6-N7              | 1.405(7)               | 1.393 | 1.413(7)               | 1.389 |
| N5-C34             | 1.399(9)               | 1.410 | -                      | -     |
| N5-C38             | -                      | -     | 1.380(9)               | 1.410 |
| N6-C35             | 1.316(8)               | 1.345 | -                      | -     |
| N6-C39             | -                      | -     | 1.314(9)               | 1.398 |
| N7-C36             | 1.308(8)               | 1.305 | -                      | -     |
| N7-C40             | -                      | -     | 1.287(9)               | 1.297 |
| C34-C35            | 1.423(9)               | 1.413 | -                      | -     |
| C36-C37            | 1.422(9)               | 1.401 | -                      | -     |
| C38-C39            | -                      | -     | 1.410(10)              | 1.419 |
| C40-C41            | -                      | -     | 1.385(10)              | 1.401 |
| Ru3···Ru4          | 5.005                  | 5.215 | 4.920                  | 4.975 |

**Table S4** Selected bond distances (Å)

| Bond ( Å )                       | [2](ClO <sub>4</sub> ) <sub>2</sub> |       | [3a](ClO <sub>4</sub> ) <sub>2</sub> |       | [3b](ClO <sub>4</sub> ) <sub>2</sub> |       |
|----------------------------------|-------------------------------------|-------|--------------------------------------|-------|--------------------------------------|-------|
|                                  | X-ray                               | DFT   | X-ray                                | DFT   | X-ray                                | DFT   |
| Ru1-N1                           | 2.051(2)                            | 2.085 | 2.042(2)                             | 2.074 | 2.059(5)                             | 2.086 |
| Ru1-N2                           | 2.119(2)                            | 2.136 | 2.164(2)                             | 2.147 | 2.152(4)                             | 2.133 |
| Ru1-N3                           | -                                   | -     | 2.032(2)                             | 2.136 | -                                    | -     |
| Ru1-N5                           | 2.056(2)                            | 2.138 | 2.061(2)                             | 2.093 | 2.043(5)                             | 2.120 |
| Ru1-N6                           | 2.051(2)                            | 2.100 | 2.013(2)                             | 2.069 | -                                    | -     |
| Ru1-N7                           | 2.058(2)                            | 2.093 | -                                    | -     | 2.048(4)                             | 2.080 |
| Ru1-N8                           | 2.050(2)                            | 2.098 | 2.027(2)                             | 2.087 | 1.981(5)                             | 2.063 |
| Ru1-N10                          | -                                   | -     | -                                    | -     | 2.051(4)                             | 2.096 |
| Ru2-N3                           | 2.120(2)                            | 2.136 | -                                    | -     | 2.123(4)                             | 2.127 |
| Ru2-N4                           | 2.077(2)                            | 2.085 | -                                    | -     | 2.041(4)                             | 2.075 |
| Ru2-N9                           | 2.077(2)                            | 2.093 | -                                    | -     | -                                    | -     |
| Ru2-N10                          | 2.055(2)                            | 2.098 | -                                    | -     | -                                    | -     |
| Ru2-N11                          | 2.058(2)                            | 2.138 | -                                    | -     | 2.052(4)                             | 2.065 |
| Ru2-N12                          | 2.054(2)                            | 2.100 | -                                    | -     | -                                    | -     |
| Ru2-N13                          | -                                   | -     | -                                    | -     | 2.052(4)                             | 2.095 |
| Ru2-N14                          | -                                   | -     | -                                    | -     | 2.016(4)                             | 2.152 |
| Ru2-N16                          | -                                   | -     | -                                    | -     | 2.043(4)                             | 2.089 |
| N2-N3                            | 1.412(3)                            | 1.395 | -                                    | -     | 1.411(6)                             | 1.394 |
| N2-N2 <sup>i</sup>               | -                                   | -     | 1.400(4)                             | 1.391 | -                                    | -     |
| N3-N4                            | -                                   | -     | 1.288(3)                             | 1.298 | -                                    | -     |
| N5-N6                            | -                                   | -     | -                                    | -     | 1.282(6)                             | 1.283 |
| N6-N7                            | -                                   | -     | 1.286(3)                             | 1.292 | -                                    | -     |
| N8-N9                            | -                                   | -     | -                                    | -     | 1.279(6)                             | 1.281 |
| N11-N12                          | -                                   | -     | -                                    | -     | 1.291(6)                             | 1.279 |
| N14-N15                          | -                                   | -     | -                                    | -     | 1.286(6)                             | 1.279 |
| N2-C5                            | 1.309(3)                            | 1.319 | 1.310(4)                             | 1.320 | 1.307(7)                             | 1.319 |
| N2 <sup>i</sup> -C5 <sup>i</sup> | -                                   | -     | 1.439(4)                             | 1.420 | -                                    | -     |
| N3-C6                            | 1.305(4)                            | 1.319 | -                                    | -     | 1.310(7)                             | 1.319 |
| C4-C5                            | 1.405(4)                            | 1.406 | 1.402(4)                             | 1.404 | 1.403(7)                             | 1.403 |
| C4 <sup>i</sup> -C5 <sup>i</sup> | -                                   | -     | 1.386(4)                             | 1.404 | -                                    | -     |
| C6-C7                            | 1.410(4)                            | 1.406 | -                                    | -     | 1.405(7)                             | 1.405 |
| Ru1...Ru2                        | 5.141                               | 5.497 | 5.351                                | 5.537 | 5.201                                | 5.467 |

**Table S5** Selected bond angles (deg)

| Bond angles (deg) | <b>1a</b> (molecule A) |        | <b>1b</b> (molecule A) |        |
|-------------------|------------------------|--------|------------------------|--------|
|                   | X-ray                  | DFT    | X-ray                  | DFT    |
| N1-Ru1-N2         | 79.00(2)               | 78.66  | 79.90(2)               | 79.03  |
| N1-Ru1-O1         | 175.57(19)             | 174.64 | 97.50(2)               | 97.91  |
| N1-Ru1-O2         | 88.24(18)              | 88.01  | 93.00(2)               | 94.05  |
| N1-Ru1-O3         | 93.03(19)              | 94.14  | 174.60(2)              | 174.06 |
| N1-Ru1-O4         | 94.7(2)                | 95.92  | 87.30(2)               | 87.69  |
| N2-Ru1-O1         | 96.71(19)              | 96.85  | 177.00(2)              | 176.93 |
| N2-Ru1-O2         | 90.23(18)              | 91.22  | 89.10(2)               | 88.52  |
| N2-Ru1-O3         | 90.67(18)              | 88.12  | 94.70(2)               | 95.84  |
| N2-Ru1-O4         | 173.00(19)             | 174.51 | 90.10(2)               | 91.42  |
| O1-Ru1-O2         | 90.91(17)              | 89.16  | 92.60(2)               | 91.39  |
| O1-Ru1-O3         | 87.87(17)              | 88.59  | 87.80(2)               | 88.74  |
| O1-Ru1-O4         | 89.60(18)              | 88.59  | 88.20(2)               | 89.44  |
| O2-Ru1-O3         | 178.57(17)             | 177.57 | 87.50(2)               | 87.21  |
| O2-Ru1-O4         | 86.64(17)              | 89.44  | 179.10(2)              | 178.20 |
| O3-Ru1-O4         | 92.60(17)              | 91.42  | 92.20(2)               | 89.78  |
| N3-Ru2-N4         | 78.90(2)               | 78.69  | 78.67(2)               | 78.96  |
| N3-Ru2-O5         | 99.10(2)               | 96.52  | 88.40(2)               | 88.27  |
| N3-Ru2-O6         | 90.30(2)               | 91.19  | 176.40(2)              | 176.93 |
| N3-Ru2-O7         | 88.40(2)               | 88.14  | 96.10(2)               | 95.94  |
| N3-Ru2-O8         | 173.30(2)              | 174.59 | 90.00(2)               | 91.58  |
| N4-Ru2-O5         | 177.10(2)              | 174.25 | 93.00(2)               | 93.94  |
| N4-Ru2-O6         | 87.30(2)               | 87.72  | 97.50(2)               | 98.00  |
| N4-Ru2-O7         | 93.00(2)               | 94.43  | 175.20(2)              | 173.98 |
| N4-Ru2-O8         | 94.70(2)               | 95.95  | 87.80(2)               | 87.64  |
| O5-Ru2-O6         | 90.60(3)               | 91.50  | 93.50(2)               | 91.49  |
| O5-Ru2-O7         | 89.10(3)               | 89.36  | 88.10(2)               | 87.11  |
| O5-Ru2-O8         | 87.30(2)               | 88.86  | 178.00(2)              | 178.35 |
| O6-Ru2-O7         | 178.60(2)              | 177.56 | 87.00(2)               | 88.73  |
| O6-Ru2-O8         | 87.50(2)               | 88.54  | 88.20(2)               | 89.06  |



**Table S6** Selected bond angles (deg)

| Bond angles (deg) | <b>1a</b> (molecule B) |        | <b>1b</b> (molecule B) |        |
|-------------------|------------------------|--------|------------------------|--------|
|                   | X-ray                  | DFT    | X-ray                  | DFT    |
| N5-Ru3-N6         | 79.80(2)               | 78.59  | 79.40(2)               | 79.02  |
| N5-Ru3-O9         | 175.30(2)              | 174.03 | 94.00(2)               | 93.89  |
| N5-Ru3-O10        | 92.20(3)               | 91.29  | 96.60(2)               | 95.78  |
| N5-Ru3-O11        | 95.10(2)               | 93.99  | 87.80(2)               | 87.09  |
| N5-Ru3-O12        | 88.90(2)               | 87.98  | 175.00(2)              | 174.98 |
| N6-Ru3-O9         | 96.90(2)               | 95.91  | 89.00(2)               | 88.69  |
| N6-Ru3-O10        | 89.30(2)               | 90.00  | 175.90(2)              | 174.76 |
| N6-Ru3-O11        | 174.10(2)              | 173.01 | 89.80(2)               | 87.84  |
| N6-Ru3-O12        | 88.90(2)               | 88.04  | 95.60(2)               | 96.01  |
| O9-Ru3-O10        | 91.10(3)               | 90.87  | 92.50(2)               | 91.59  |
| O9-Ru3-O11        | 88.40(2)               | 87.99  | 177.60(2)              | 176.82 |
| O9-Ru3-O12        | 87.80(2)               | 87.89  | 86.90(2)               | 85.91  |
| O10-Ru3-O11       | 88.00(3)               | 87.09  | 88.80(2)               | 87.98  |
| O10-Ru3-O12       | 177.70(2)              | 176.71 | 88.30(2)               | 87.00  |
| O11-Ru3-O12       | 94.00(3)               | 93.09  | 91.20(2)               | 92.00  |
| N7-Ru4-N8         | 78.80(2)               | 77.98  | 79.00(3)               | 77.99  |
| N7-Ru4-O13        | 99.38(19)              | 98.99  | 95.00(2)               | 95.09  |
| N7-Ru4-O14        | 92.46(19)              | 91.69  | 90.00(2)               | 90.10  |
| N7-Ru4-O15        | 173.40(2)              | 173.00 | 89.00(2)               | 88.95  |
| N7-Ru4-O16        | 87.83(19)              | 86.78  | 97.00(2)               | 96.89  |
| N8-Ru4-O13        | 178.10(2)              | 177.88 | 173.60(2)              | 174.69 |
| N8-Ru4-O14        | 88.20(2)               | 87.77  | 85.40(2)               | 84.89  |
| N8-Ru4-O15        | 94.70(2)               | 93.89  | 95.10(2)               | 95.00  |
| N8-Ru4-O16        | 92.70(2)               | 90.99  | 97.00(2)               | 96.09  |
| O13-Ru4-O14       | 91.60(2)               | 92.00  | 92.40(2)               | 92.01  |
| O13-Ru4-O15       | 87.18(19)              | 86.45  | 86.94(19)              | 87.04  |
| O13-Ru4-O16       | 87.50(2)               | 86.67  | 88.90(2)               | 88.89  |
| O14-Ru4-O15       | 86.60(2)               | 87.09  | 178.85(19)             | 177.91 |
| O14-Ru4-O16       | 179.10(2)              | 178.78 | 88.80(2)               | 89.00  |
| O15-Ru4-O16       | 93.20(2)               | 94.00  | 92.10(2)               | 93.01  |

**Table S7** Selected bond angles (deg)

| Bond angles (deg) | [2](ClO <sub>4</sub> ) <sub>2</sub> |        |
|-------------------|-------------------------------------|--------|
|                   | X-ray                               | DFT    |
| N1-Ru1-N2         | 77.78(9)                            | 77.14  |
| N3-Ru2-N4         | 77.32(9)                            | 77.14  |
| N1-Ru1-N5         | 172.96(9)                           | 172.06 |
| N1-Ru1-N6         | 94.79(9)                            | 94.72  |
| N1-Ru1-N7         | 87.05(9)                            | 88.62  |
| N1-Ru1-N8         | 93.52(9)                            | 91.75  |
| N2-Ru1-N5         | 98.99(9)                            | 96.25  |
| N2-Ru1-N6         | 85.45(9)                            | 88.72  |
| N2-Ru1-N7         | 100.69(9)                           | 103.12 |
| N2-Ru1-N8         | 171.30(9)                           | 167.71 |
| N5-Ru1-N6         | 78.64(9)                            | 77.99  |
| N5-Ru1-N7         | 99.75(9)                            | 99.19  |
| N5-Ru1-N8         | 89.64(9)                            | 88.59  |
| N6-Ru1-N7         | 173.84(9)                           | 174.52 |
| N6-Ru1-N8         | 95.23(9)                            | 97.54  |
| N7-Ru1-N8         | 78.77(10)                           | 77.37  |
| N3-Ru2-N9         | 101.69(9)                           | 103.13 |
| N3-Ru2-N10        | 89.66(9)                            | 88.73  |
| N3-Ru2-N11        | 96.04(9)                            | 96.24  |
| N3-Ru2-N12        | 170.79(9)                           | 167.71 |
| N4-Ru2-N9         | 173.15(9)                           | 172.06 |
| N4-Ru2-N10        | 94.92(9)                            | 94.72  |
| N4-Ru2-N11        | 88.47(9)                            | 88.62  |
| N4-Ru2-N12        | 94.89(9)                            | 91.75  |
| N9-Ru2-N10        | 78.26(9)                            | 77.37  |
| N9-Ru2-N11        | 98.38(9)                            | 97.55  |
| N9-Ru2-N12        | 86.62(9)                            | 88.58  |
| N10-Ru2-N11       | 173.89(9)                           | 174.52 |
| N10-Ru2-N12       | 95.97(9)                            | 99.19  |
| N11-Ru2-N12       | 78.66(9)                            | 77.99  |

**Table S8** Selected bond angles (deg)

| Bond angles (deg) | <b>[3a](ClO<sub>4</sub>)<sub>2</sub></b> |        |
|-------------------|------------------------------------------|--------|
|                   | X-ray                                    | DFT    |
| N1-Ru1-N2         | 76.77(9)                                 | 77.13  |
| N1-Ru1-N3         | 166.77(9)                                | 168.12 |
| N1-Ru1-N5         | 93.36(10)                                | 93.51  |
| N1-Ru1-N6         | 91.06(10)                                | 93.89  |
| N1-Ru1-N8         | 89.67(10)                                | 86.98  |
| N2-Ru1-N3         | 108.25(9)                                | 105.01 |
| N2-Ru1-N5         | 83.11(9)                                 | 86.93  |
| N2-Ru1-N6         | 165.01(10)                               | 167.29 |
| N3-Ru1-N5         | 75.46(10)                                | 75.07  |
| N3-Ru1-N6         | 85.54(10)                                | 85.62  |
| N3-Ru1-N8         | 101.91(10)                               | 104.35 |
| N5-Ru1-N6         | 106.63(10)                               | 102.77 |
| N5-Ru1-N8         | 175.59(9)                                | 178.63 |
| N6-Ru1-N8         | 76.49(10)                                | 75.92  |

**Table S9** Selected bond angles (deg)

| Bond angles (deg) | [3b](ClO <sub>4</sub> ) <sub>2</sub> |        |
|-------------------|--------------------------------------|--------|
|                   | X-ray                                | DFT    |
| N1-Ru1-N2         | 77.44(17)                            | 77.05  |
| N3-Ru2-N4         | 77.78(16)                            | 77.16  |
| N1-Ru1-N5         | 169.22(17)                           | 166.39 |
| N1-Ru1-N7         | 93.80(18)                            | 91.58  |
| N1-Ru1-N8         | 90.81(19)                            | 89.20  |
| N1-Ru1-N10        | 87.33(17)                            | 86.93  |
| N2-Ru1-N5         | 97.05(17)                            | 97.40  |
| N2-Ru1-N7         | 87.26(17)                            | 87.43  |
| N2-Ru1-N8         | 167.54(18)                           | 163.87 |
| N2-Ru1-N10        | 98.45(16)                            | 94.39  |
| N5-Ru1-N7         | 76.54(19)                            | 75.63  |
| N5-Ru1-N8         | 95.21(18)                            | 97.80  |
| N5-Ru1-N10        | 102.75(17)                           | 106.02 |
| N7-Ru1-N8         | 97.76(18)                            | 101.52 |
| N7-Ru1-N10        | 174.29(18)                           | 177.33 |
| N8-Ru1-N10        | 76.62(17)                            | 76.25  |
| N3-Ru2-N11        | 98.11(16)                            | 99.83  |
| N3-Ru2-N13        | 88.09(16)                            | 87.56  |
| N3-Ru2-N14        | 165.46(17)                           | 166.95 |
| N3-Ru2-N16        | 93.47(17)                            | 94.19  |
| N4-Ru2-N11        | 166.15(17)                           | 166.98 |
| N4-Ru2-N13        | 90.56(17)                            | 91.87  |
| N4-Ru2-N14        | 91.12(17)                            | 93.46  |
| N4-Ru2-N16        | 88.50(17)                            | 86.58  |
| N11-Ru2-N13       | 76.01(18)                            | 75.28  |
| N11-Ru2-N14       | 94.81(17)                            | 91.28  |
| N11-Ru2-N16       | 105.04(17)                           | 106.33 |
| N13-Ru2-N14       | 101.54(17)                           | 101.97 |
| N13-Ru2-N16       | 177.97(17)                           | 177.34 |
| N14-Ru2-N16       | 76.68(17)                            | 75.98  |

**Table S10** Intermolecular C-H... $\pi$  interactions

| Interaction<br>C-H... $\pi$ (Å) | [ <b>2</b> ](ClO <sub>4</sub> ) <sub>2</sub> | [ <b>3a</b> ](ClO <sub>4</sub> ) <sub>2</sub> | [ <b>3b</b> ](ClO <sub>4</sub> ) <sub>2</sub> |
|---------------------------------|----------------------------------------------|-----------------------------------------------|-----------------------------------------------|
| C8---H49                        | 2.836                                        | -                                             | -                                             |
| C9---H49                        | 2.744                                        | -                                             | -                                             |
| C49---H40                       | 2.893                                        | -                                             | -                                             |
| C39---H10                       | 2.792                                        | -                                             | -                                             |
| C3---H11                        | -                                            | 2.655                                         | -                                             |
| C7---H13                        | -                                            | 2.766                                         | -                                             |
| C1---H30                        | -                                            | -                                             | 2.759                                         |
| C2---H30                        | -                                            | -                                             | 2.758                                         |
| C3---H30                        | -                                            | -                                             | 2.752                                         |
| C4---H30                        | -                                            | -                                             | 2.727                                         |

**Table S11** Energies of DFT (B3LYP/LanL2DZ/6-31G\*) calculated optimised structures

| Complex               | $E$ (Hartrees) |               |               |               | $\Delta E_{(\text{HE-LE})}^a$                       |
|-----------------------|----------------|---------------|---------------|---------------|-----------------------------------------------------|
|                       | $S = 0$        | $S = 1/2$     | $S = 1$       | $S = 3/2$     |                                                     |
| <b>1b<sup>+</sup></b> | -              | -2330.6658737 | -             | -2330.6648219 | 0.0010518 Hartrees<br>290.84341583 cm <sup>-1</sup> |
| <b>1b<sup>0</sup></b> | -2330.8396338  | -             | -2330.8593586 | -             | 0.0197248 Hartrees<br>4329.0931818 cm <sup>-1</sup> |
| <b>1b<sup>-</sup></b> | -              | -2330.9293102 | -             | -2330.8663904 | 0.0629198 Hartrees<br>13809.299825 cm <sup>-1</sup> |
| <b>2<sup>4+</sup></b> | -2773.213059   | -             | -2773.2084285 | -             | 0.0046305 Hartrees<br>1016.277274 cm <sup>-1</sup>  |
| <b>2<sup>0</sup></b>  | -2774.3493344  | -             | -2774.3626048 | -             | 0.0132704 Hartrees<br>2912.51613 cm <sup>-1</sup>   |
| <b>3a<sup>0</sup></b> | -3148.084729   | -             | -3148.1016969 | -             | 0.019224 Hartrees<br>4219.18029 cm <sup>-1</sup>    |
| <b>3b<sup>0</sup></b> | -3148.0802045  | -             | -3148.0981333 | -             | 0.0179255 Hartrees<br>3934.19248 cm <sup>-1</sup>   |

<sup>a</sup> HE = Spin state in higher in energy and LE = Spin state in lower in energy.

**Table S12** DFT calculated selected MO compositions

| Complex                                 | MO            | Fragments  | % Contribution |
|-----------------------------------------|---------------|------------|----------------|
| <b>1b<sup>+</sup></b> ( <i>S</i> =1/2)  | $\beta$ -LUMO | Ru/acac/L  | 69/22/09       |
| <b>1b</b> ( <i>S</i> =1)                | SOMO          | L/Ru /acac | 85/12/03       |
|                                         | $\beta$ -LUMO | Ru/acac/L  | 68/20/12       |
| <b>1b<sup>-</sup></b> ( <i>S</i> =1/2)  | HOMO          | Ru/L/acac  | 55/36/09       |
| <b>2<sup>4+</sup></b> ( <i>S</i> =0)    | LUMO          | L/Ru/bpy   | 66/30/04       |
| <b>2<sup>3+</sup></b> ( <i>S</i> =1/2)  | SOMO          | L/Ru/bpy   | 84/13/03       |
|                                         | $\beta$ -LUMO | L/Ru/bpy   | 84/14/02       |
| <b>2<sup>2+</sup></b> ( <i>S</i> =0)    | HOMO          | L/Ru/bpy   | 83/14/03       |
|                                         | LUMO          | bpy/Ru/L   | 90/07/03       |
| <b>2<sup>+</sup></b> ( <i>S</i> =1/2)   | SOMO          | bpy/Ru/L   | 94/05/01       |
|                                         | $\beta$ -LUMO | bpy/Ru/L   | 93/06/01       |
| <b>2<sup>0</sup></b> ( <i>S</i> =1)     | SOMO          | bpy/Ru/L   | 94/05/01       |
| <b>3a<sup>3+</sup></b> ( <i>S</i> =1/2) | LUMO          | L/Ru/pap   | 90/08/02       |
| <b>3a<sup>2+</sup></b> ( <i>S</i> =0)   | HOMO          | L/Ru/pap   | 92/06/02       |
|                                         | LUMO          | pap/Ru/L   | 83/14/02       |
| <b>3a<sup>+</sup></b> ( <i>S</i> =1/2)  | SOMO          | pap/Ru/L   | 89/09/02       |
|                                         | $\beta$ -LUMO | pap/Ru/L   | 87/11/02       |
| <b>3a<sup>0</sup></b> ( <i>S</i> =1)    | SOMO          | pap/Ru/L   | 90/08/02       |
| <b>3b<sup>3+</sup></b> ( <i>S</i> =1/2) | LUMO          | L/Ru/pap   | 88/09/03       |
| <b>3b<sup>2+</sup></b> ( <i>S</i> =0)   | HOMO          | L/Ru/pap   | 87/08/05       |
|                                         | LUMO          | pap/Ru/L   | 88/09/03       |
| <b>3b<sup>+</sup></b> ( <i>S</i> =1/2)  | SOMO          | pap/Ru/L   | 89/09/02       |
|                                         | $\beta$ -LUMO | pap/Ru/L   | 86/12/02       |
| <b>3b<sup>0</sup></b> ( <i>S</i> =1)    | SOMO          | pap/Ru/L   | 90/08/02       |

**Table S13** DFT calculated MO composition for **1b<sup>+</sup>** in  $S = 1/2$  state

| MO           | Energy (eV) | % Composition |                |                   |
|--------------|-------------|---------------|----------------|-------------------|
|              |             | Ru            | L <sup>-</sup> | acac <sup>-</sup> |
| $\alpha$ -MO |             |               |                |                   |
| LUMO+5       | -3.324      | 07            | 28             | 65                |
| LUMO+4       | -3.401      | 07            | 20             | 73                |
| LUMO+3       | -3.426      | 03            | 02             | 95                |
| LUMO+2       | -3.627      | 05            | 09             | 86                |
| LUMO+1       | -4.156      | 05            | 92             | 03                |
| LUMO         | -6.583      | 13            | 84             | 03                |
| SOMO         | -7.894      | 38            | 41             | 21                |
| HOMO-1       | -8.176      | 36            | 48             | 16                |
| HOMO-2       | -8.283      | 32            | 13             | 55                |
| HOMO-3       | -8.350      | 36            | 22             | 42                |
| HOMO-4       | -8.501      | 20            | 42             | 38                |
| HOMO-5       | -8.720      | 11            | 28             | 61                |
| $\beta$ -MO  |             |               |                |                   |
| LUMO+5       | -3.399      | 05            | 04             | 91                |
| LUMO+4       | -3.473      | 06            | 39             | 55                |
| LUMO+3       | -3.625      | 05            | 38             | 57                |
| LUMO+2       | -4.291      | 06            | 91             | 03                |
| LUMO+1       | -5.642      | 67            | 11             | 22                |
| LUMO         | -5.648      | 69            | 09             | 22                |
| HOMO         | -7.809      | 41            | 46             | 13                |
| HOMO-1       | -7.954      | 51            | 24             | 25                |
| HOMO-2       | -8.163      | 26            | 46             | 28                |
| HOMO-3       | -8.462      | 45            | 14             | 41                |
| HOMO-4       | -8.622      | 37            | 15             | 48                |
| HOMO-5       | -8.729      | 34            | 28             | 38                |



$\alpha$ -MO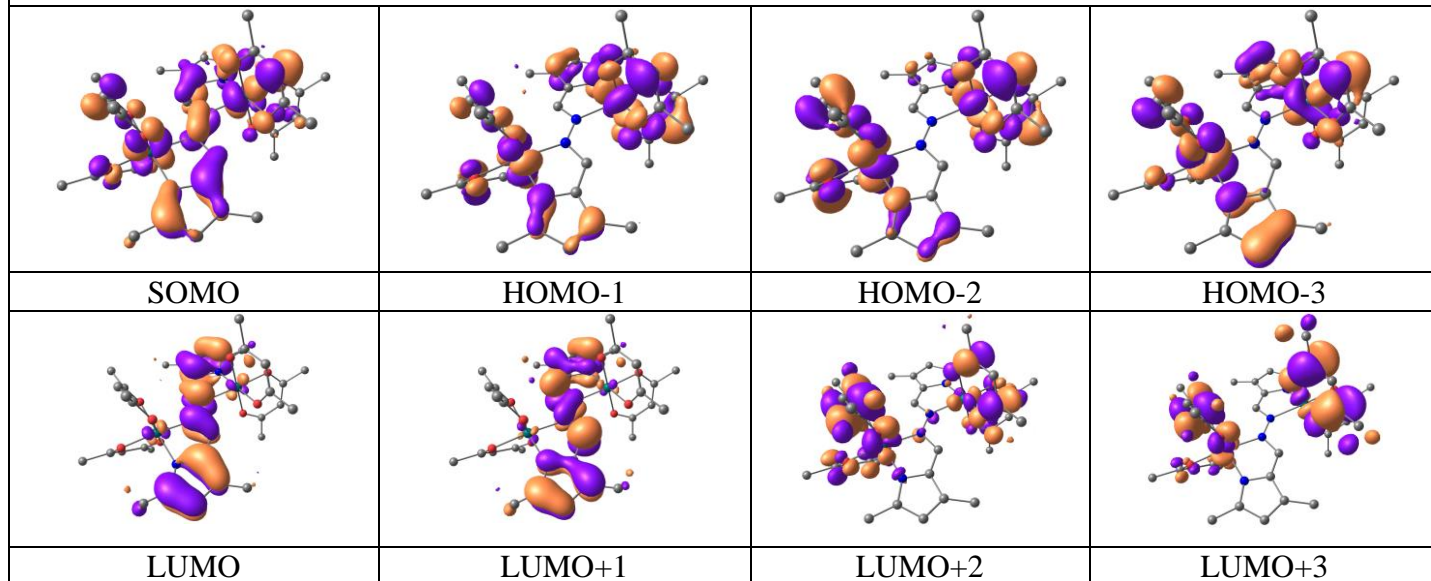 $\beta$ -MO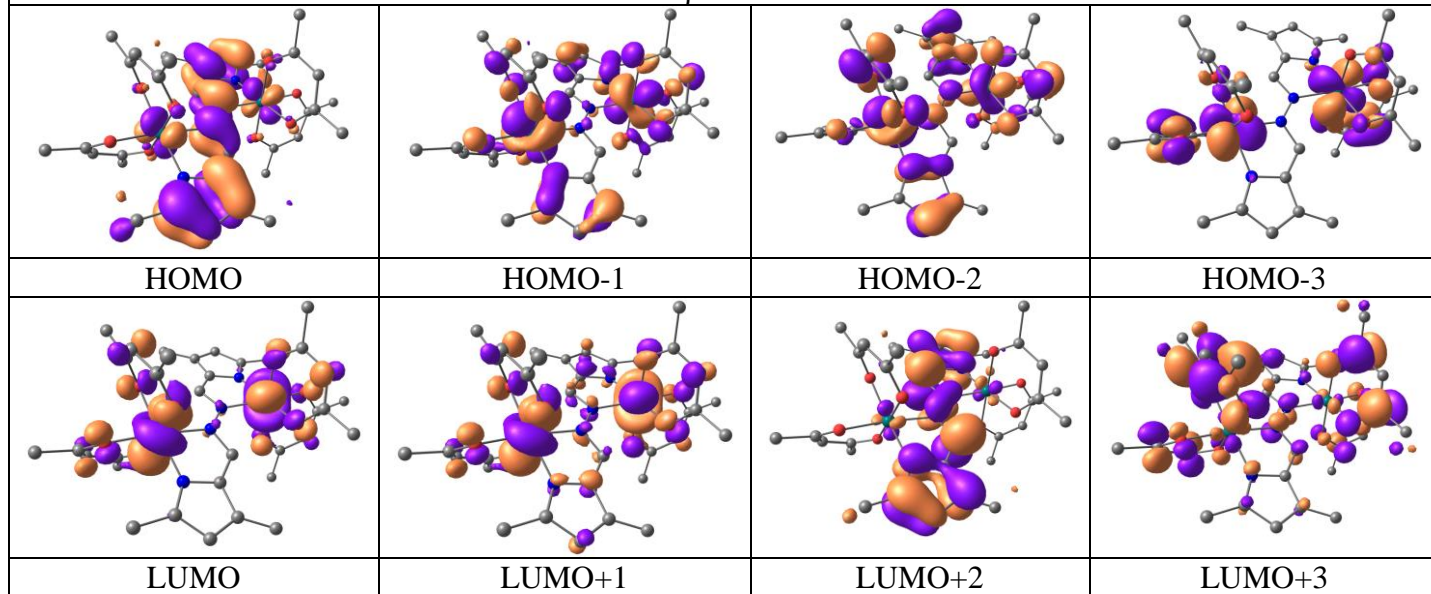

**Table S14** DFT calculated MO composition for **1b** in  $S = 1$  state

| MO           | Energy (eV) | % Composition |                |                   |
|--------------|-------------|---------------|----------------|-------------------|
|              |             | Ru            | L <sup>-</sup> | acac <sup>-</sup> |
| $\alpha$ -MO |             |               |                |                   |
| LUMO+5       | -0.133      | 23            | 61             | 16                |
| LUMO+4       | -0.552      | 03            | 07             | 90                |
| LUMO+3       | -0.707      | 05            | 05             | 90                |
| LUMO+2       | -0.767      | 03            | 03             | 94                |
| LUMO+1       | -0.902      | 06            | 57             | 37                |
| LUMO         | -0.944      | 03            | 32             | 65                |
| SOMO1        | -4.324      | 12            | 85             | 03                |
| SOMO2        | -4.951      | 42            | 45             | 13                |
| HOMO-2       | -5.051      | 35            | 56             | 09                |
| HOMO-3       | -5.216      | 27            | 55             | 18                |
| HOMO-4       | -5.481      | 37            | 07             | 56                |
| HOMO-5       | -5.561      | 34            | 23             | 43                |
| $\beta$ -MO  |             |               |                |                   |
| LUMO+5       | -0.651      | 07            | 05             | 88                |
| LUMO+4       | -0.735      | 03            | 02             | 95                |
| LUMO+3       | -0.868      | 07            | 45             | 48                |
| LUMO+2       | -0.908      | 04            | 44             | 52                |
| LUMO+1       | -2.506      | 65            | 16             | 19                |
| LUMO         | -2.625      | 68            | 12             | 20                |
| HOMO         | -4.304      | 21            | 72             | 07                |
| HOMO-1       | -4.763      | 49            | 35             | 16                |
| HOMO-2       | -4.901      | 37            | 46             | 17                |
| HOMO-3       | -5.268      | 19            | 67             | 14                |
| HOMO-4       | -5.476      | 67            | 14             | 19                |
| HOMO-5       | -5.556      | 64            | 13             | 23                |

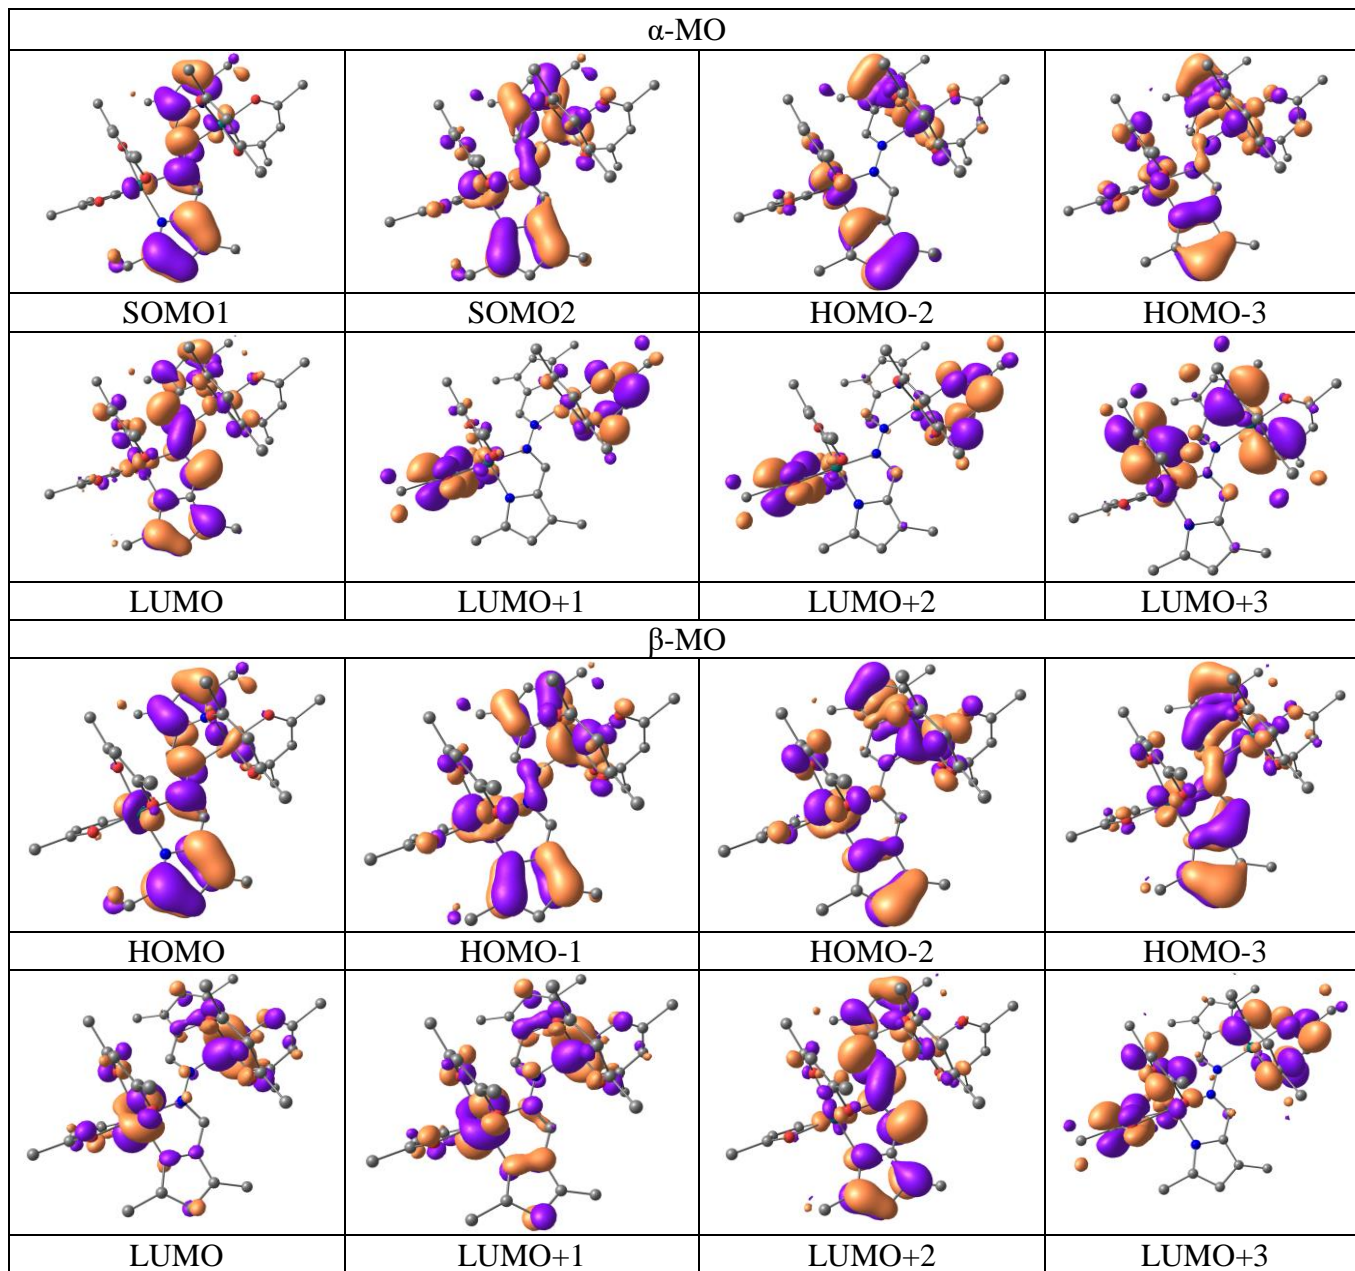

**Table S15** DFT calculated MO composition for **1b<sup>-</sup>** in  $S = 1/2$  state

| MO           | Energy (eV) | % Composition |                |                   |
|--------------|-------------|---------------|----------------|-------------------|
|              |             | Ru            | L <sup>-</sup> | acac <sup>-</sup> |
| $\alpha$ -MO |             |               |                |                   |
| LUMO+5       | 3.008       | 13            | 74             | 13                |
| LUMO+4       | 2.556       | 05            | 08             | 87                |
| LUMO+3       | 2.365       | 05            | 05             | 90                |
| LUMO+2       | 2.302       | 05            | 02             | 93                |
| LUMO+1       | 2.053       | 08            | 79             | 13                |
| LUMO         | 1.876       | 04            | 11             | 85                |
| SOMO         | -1.222      | 36            | 55             | 09                |
| HOMO-1       | -1.308      | 60            | 22             | 18                |
| HOMO-2       | -1.573      | 54            | 23             | 23                |
| HOMO-3       | -1.718      | 61            | 23             | 16                |
| HOMO-4       | -1.898      | 62            | 17             | 21                |
| HOMO-5       | -2.100      | 52            | 23             | 25                |
| $\beta$ -MO  |             |               |                |                   |
| LUMO+5       | 2.578       | 07            | 09             | 85                |
| LUMO+4       | 2.379       | 05            | 06             | 89                |
| LUMO+3       | 2.324       | 06            | 02             | 92                |
| LUMO+2       | 2.109       | 09            | 81             | 10                |
| LUMO+1       | 1.896       | 05            | 09             | 86                |
| LUMO         | 0.133       | 59            | 23             | 17                |
| HOMO         | -0.536      | 69            | 11             | 21                |
| HOMO-1       | -1.176      | 55            | 32             | 14                |
| HOMO-2       | -1.448      | 51            | 34             | 15                |
| HOMO-3       | -1.661      | 58            | 23             | 19                |
| HOMO-4       | -1.850      | 52            | 32             | 16                |
| HOMO-5       | -2.150      | 70            | 13             | 17                |

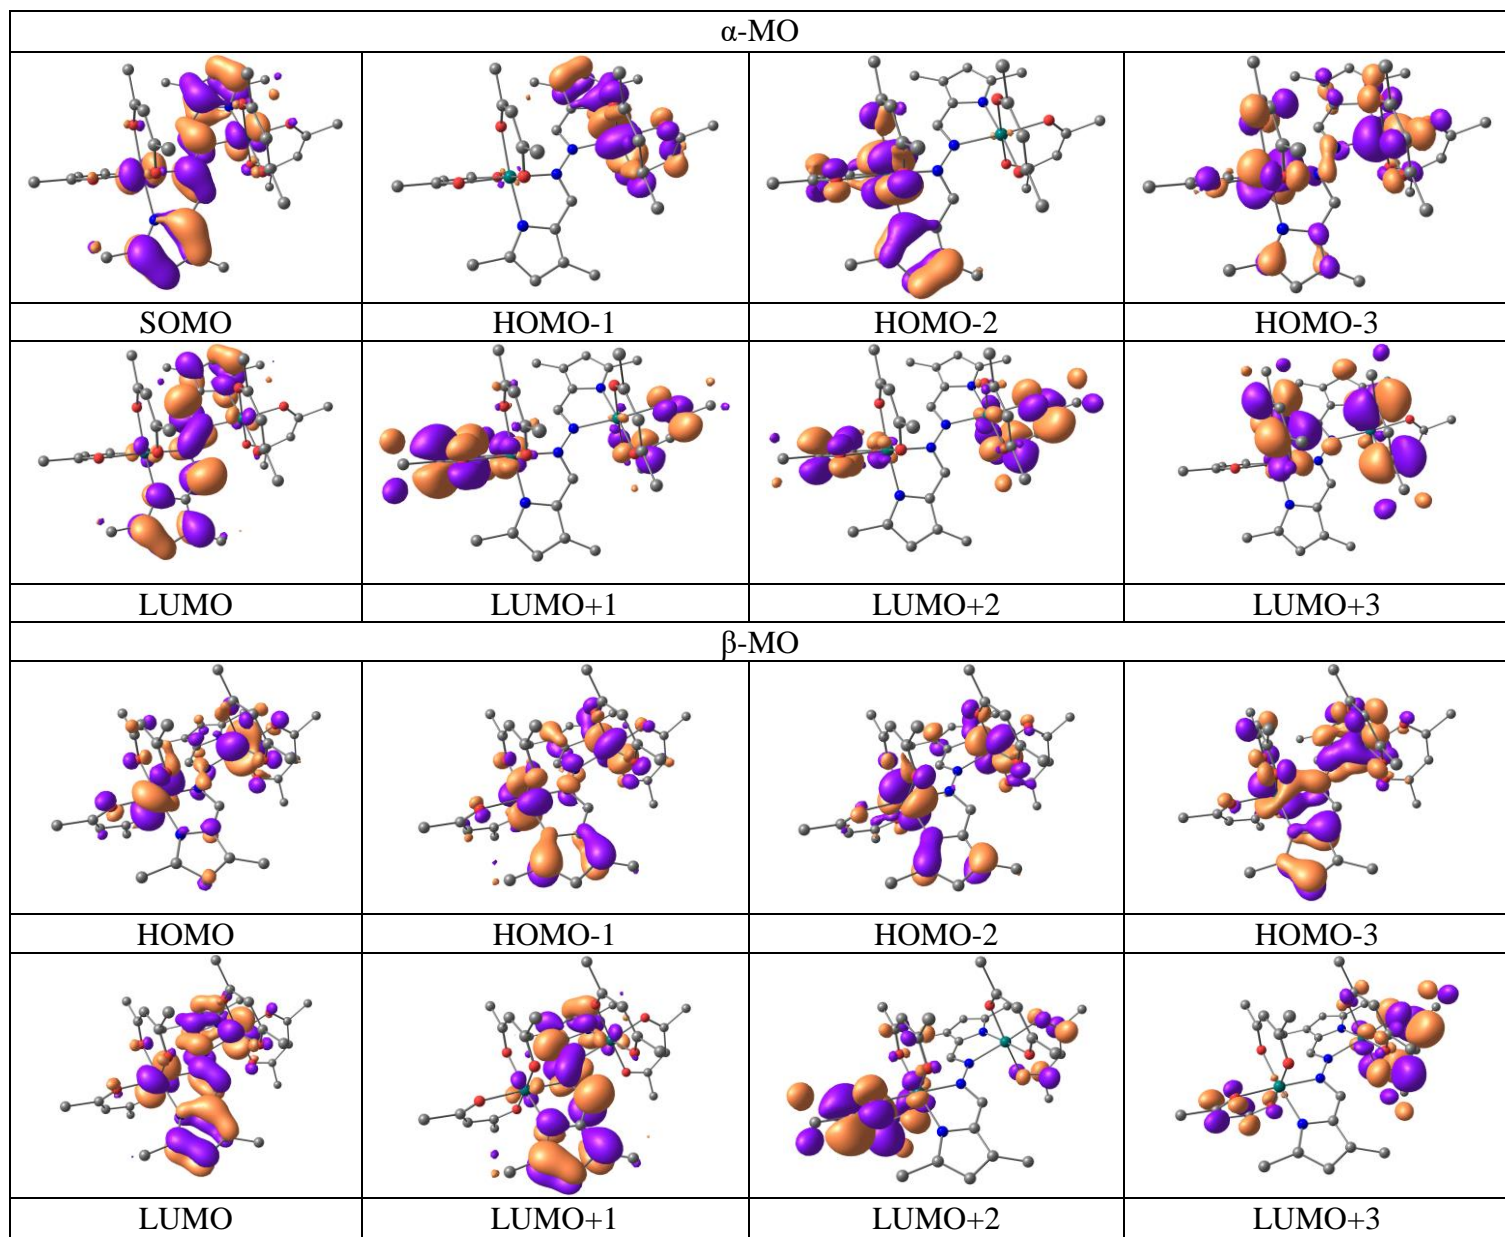

**Table S16** DFT calculated MO composition for  $2^{4+}$  in  $S = 0$  state

| MO     | Energy (eV) | % Composition |                |     |
|--------|-------------|---------------|----------------|-----|
|        |             | Ru            | L <sup>-</sup> | bpy |
| LUMO+5 | -11.047     | 05            | 01             | 94  |
| LUMO+4 | -11.055     | 05            | 01             | 94  |
| LUMO+3 | -11.307     | 06            | 03             | 91  |
| LUMO+2 | -11.314     | 05            | 02             | 93  |
| LUMO+1 | -11.713     | 03            | 92             | 05  |
| LUMO   | -14.213     | 30            | 66             | 04  |
| HOMO   | -15.133     | 71            | 18             | 11  |
| HOMO-1 | -15.218     | 63            | 25             | 12  |
| HOMO-2 | -15.460     | 78            | 08             | 14  |
| HOMO-3 | -15.466     | 74            | 07             | 19  |
| HOMO-4 | -15.559     | 73            | 07             | 20  |
| HOMO-5 | -15.773     | 63            | 19             | 18  |

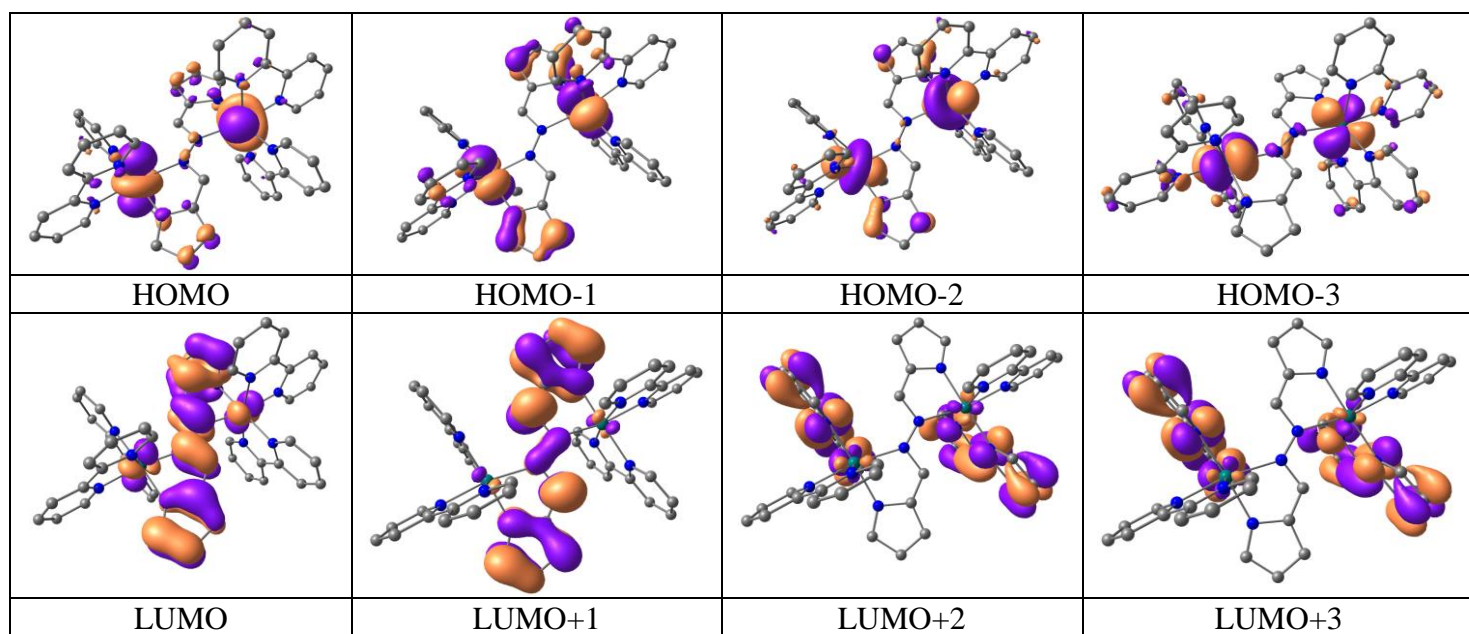

**Table S17** DFT calculated MO composition for  $2^{3+}$  in  $S = 1/2$  state

| MO           | Energy (eV) | % Composition |                |     |
|--------------|-------------|---------------|----------------|-----|
|              |             | Ru            | L <sup>-</sup> | bpy |
| $\alpha$ -MO |             |               |                |     |
| LUMO+5       | -7.967      | 06            | 04             | 90  |
| LUMO+4       | -8.641      | 07            | 22             | 71  |
| LUMO+3       | -8.661      | 06            | 01             | 93  |
| LUMO+2       | -8.684      | 04            | 62             | 34  |
| LUMO+1       | -8.847      | 05            | 01             | 94  |
| LUMO         | -8.848      | 05            | 09             | 86  |
| SOMO         | -12.156     | 45            | 50             | 05  |
| HOMO-1       | -12.224     | 69            | 21             | 10  |
| HOMO-2       | -12.263     | 55            | 36             | 09  |
| HOMO-3       | -12.514     | 80            | 05             | 15  |
| HOMO-4       | -12.619     | 80            | 06             | 14  |
| HOMO-5       | -12.632     | 82            | 05             | 13  |
| $\beta$ -MO  |             |               |                |     |
| LUMO+5       | -8.538      | 05            | 85             | 10  |
| LUMO+4       | -8.653      | 06            | 02             | 92  |
| LUMO+3       | -8.659      | 06            | 01             | 93  |
| LUMO+2       | -8.837      | 06            | 04             | 90  |
| LUMO+1       | -8.844      | 05            | 01             | 94  |
| LUMO         | -10.809     | 14            | 84             | 02  |
| HOMO         | -12.127     | 70            | 20             | 10  |
| HOMO-1       | -12.176     | 67            | 23             | 10  |
| HOMO-2       | -12.386     | 70            | 19             | 11  |
| HOMO-3       | -12.482     | 79            | 06             | 15  |
| HOMO-4       | -12.569     | 79            | 08             | 13  |
| HOMO-5       | -12.708     | 76            | 09             | 15  |



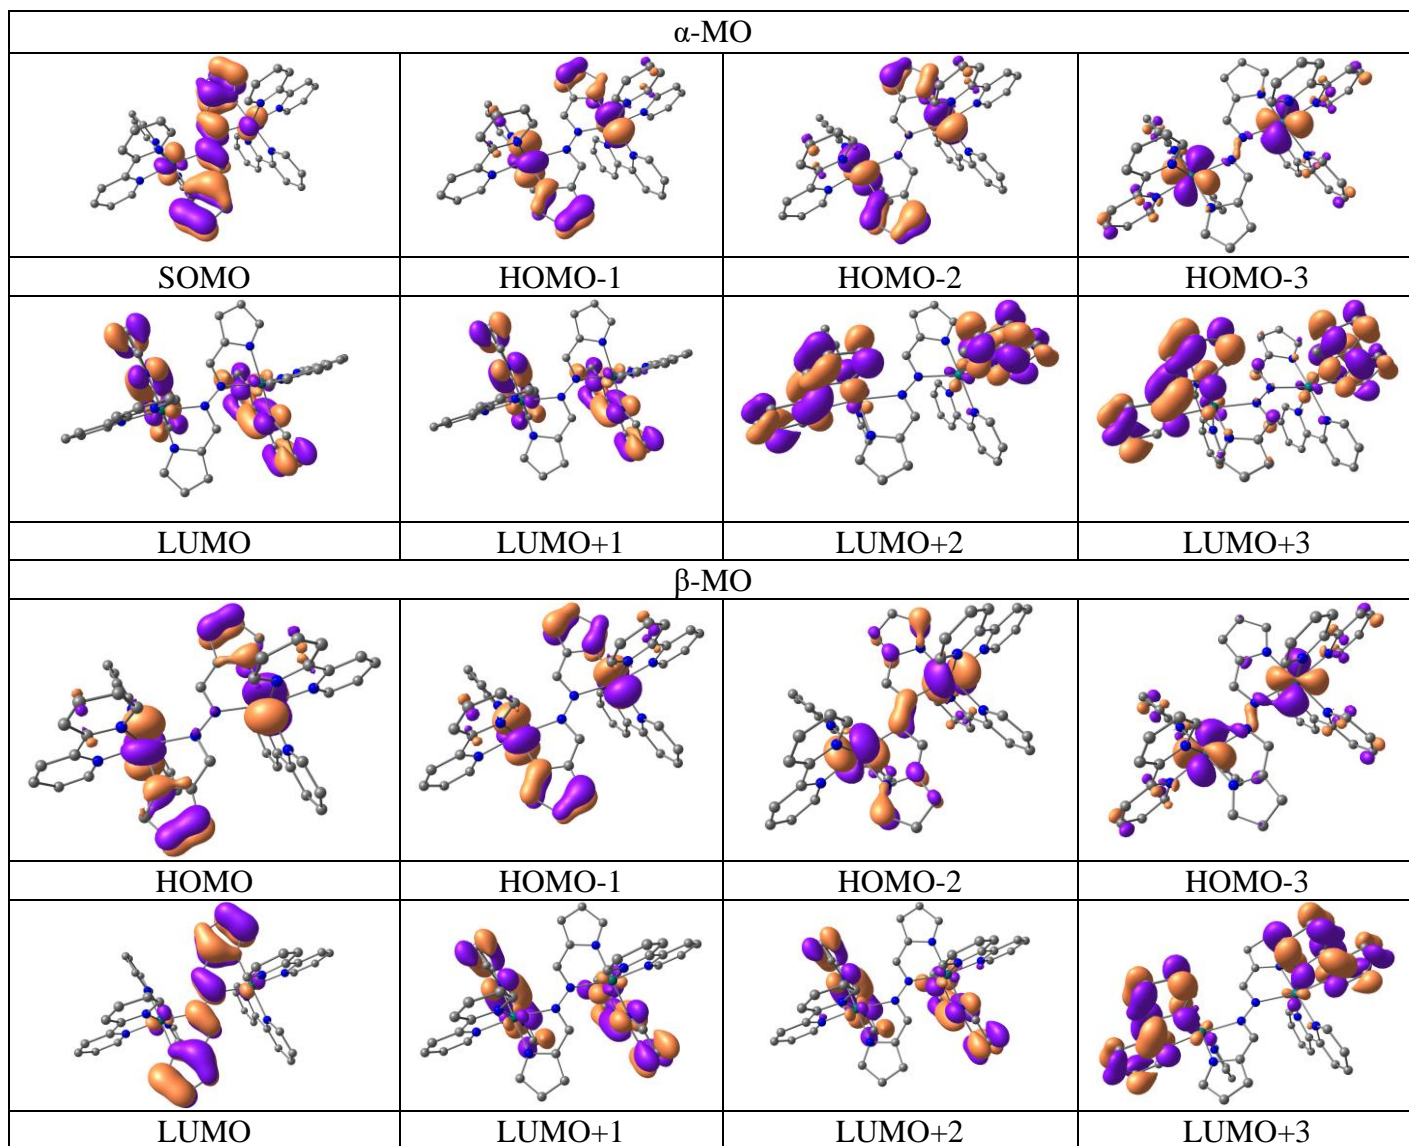

**Table S18** DFT calculated MO composition for  $2^{2+}$  in  $S = 0$  state

| MO     | Energy (eV) | % Composition |                |     |
|--------|-------------|---------------|----------------|-----|
|        |             | Ru            | L <sup>-</sup> | bpy |
| LUMO+5 | -5.733      | 03            | 03             | 94  |
| LUMO+4 | -5.923      | 06            | 02             | 92  |
| LUMO+3 | -6.366      | 07            | 01             | 91  |
| LUMO+2 | -6.379      | 08            | 01             | 91  |
| LUMO+1 | -6.571      | 05            | 01             | 94  |
| LUMO   | -6.708      | 07            | 03             | 90  |
| HOMO   | -8.754      | 14            | 83             | 03  |
| HOMO-1 | -9.337      | 54            | 36             | 10  |
| HOMO-2 | -9.360      | 51            | 39             | 10  |
| HOMO-3 | -9.649      | 37            | 54             | 09  |
| HOMO-4 | -9.865      | 78            | 05             | 17  |
| HOMO-5 | -9.983      | 77            | 08             | 15  |

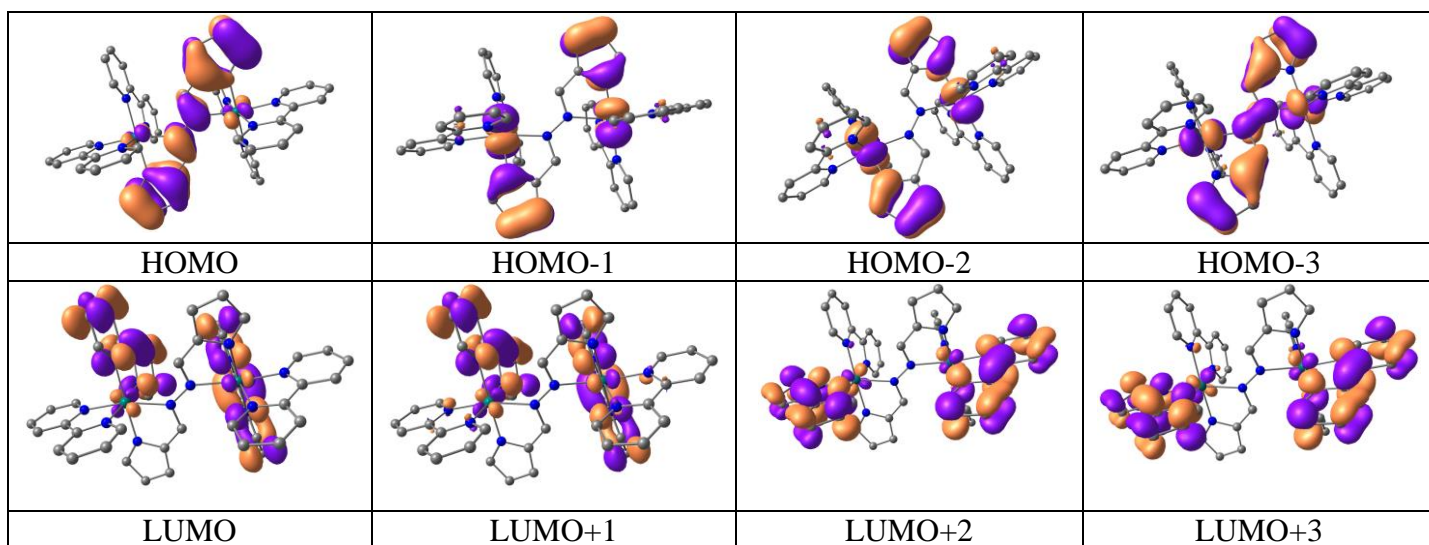

**Table S19** DFT calculated MO composition for  $2^+$  in  $S = 1/2$  state

| MO           | Energy (eV) | % Composition |                |     |
|--------------|-------------|---------------|----------------|-----|
|              |             | Ru            | L <sup>-</sup> | bpy |
| $\alpha$ -MO |             |               |                |     |
| LUMO+5       | -3.004      | 07            | 63             | 30  |
| LUMO+4       | -3.154      | 05            | 02             | 93  |
| LUMO+3       | -3.191      | 05            | 16             | 79  |
| LUMO+2       | -4.003      | 09            | 02             | 89  |
| LUMO+1       | -4.065      | 08            | 01             | 91  |
| LUMO         | -4.202      | 05            | 01             | 94  |
| SOMO         | -4.561      | 04            | 01             | 95  |
| HOMO-1       | -6.277      | 11            | 87             | 02  |
| HOMO-2       | -6.871      | 62            | 29             | 09  |
| HOMO-3       | -6.886      | 60            | 30             | 10  |
| HOMO-4       | -7.254      | 64            | 22             | 14  |
| HOMO-5       | -7.280      | 79            | 09             | 12  |
| $\beta$ -MO  |             |               |                |     |
| LUMO+5       | -3.130      | 05            | 02             | 93  |
| LUMO+4       | -3.173      | 05            | 19             | 76  |
| LUMO+3       | -3.714      | 07            | 02             | 90  |
| LUMO+2       | -3.732      | 06            | 01             | 93  |
| LUMO+1       | -3.879      | 06            | 01             | 93  |
| LUMO         | -3.884      | 06            | 01             | 93  |
| HOMO         | -6.277      | 11            | 87             | 02  |
| HOMO-1       | -6.861      | 62            | 28             | 09  |
| HOMO-2       | -6.873      | 61            | 29             | 10  |
| HOMO-3       | -7.245      | 64            | 25             | 12  |
| HOMO-4       | -7.278      | 81            | 05             | 14  |
| HOMO-5       | -7.362      | 80            | 07             | 13  |

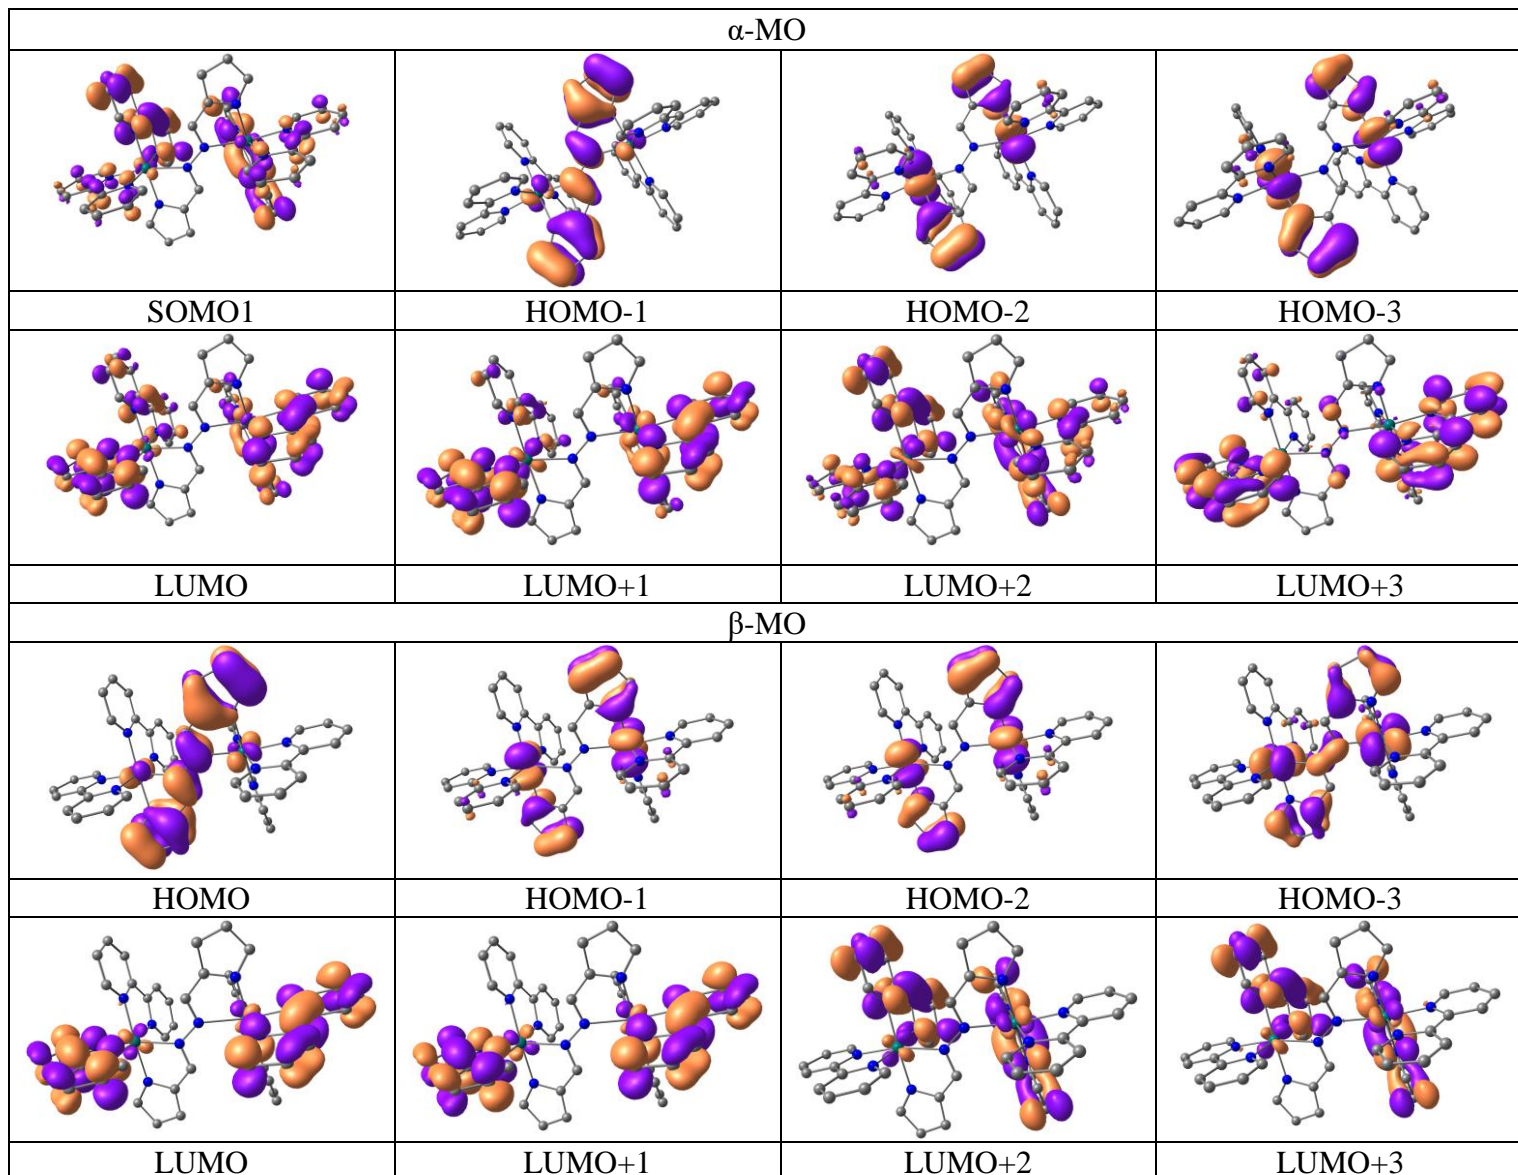

**Table S20** DFT calculated MO composition for **2<sup>0</sup>** in *S* = 1 state

| MO           | Energy (eV) | % Composition |                |     |
|--------------|-------------|---------------|----------------|-----|
|              |             | Ru            | L <sup>-</sup> | bpy |
| $\alpha$ -MO |             |               |                |     |
| LUMO+5       | -0.493      | 08            | 02             | 90  |
| LUMO+4       | -0.637      | 06            | 35             | 59  |
| LUMO+3       | -0.702      | 07            | 02             | 91  |
| LUMO+2       | -0.787      | 06            | 47             | 47  |
| LUMO+1       | -1.691      | 10            | 02             | 88  |
| LUMO         | -1.721      | 09            | 01             | 90  |
| SOMO1        | -2.343      | 05            | 01             | 94  |
| SOMO2        | -2.351      | 04            | 01             | 95  |
| HOMO-2       | -3.973      | 15            | 83             | 02  |
| HOMO-3       | -4.454      | 67            | 23             | 10  |
| HOMO-4       | -4.476      | 64            | 26             | 10  |
| HOMO-5       | -4.777      | 76            | 07             | 17  |
| $\beta$ -MO  |             |               |                |     |
| LUMO+5       | -0.650      | 07            | 02             | 91  |
| LUMO+4       | -0.768      | 06            | 57             | 37  |
| LUMO+3       | -1.177      | 07            | 01             | 92  |
| LUMO+2       | -1.189      | 07            | 01             | 92  |
| LUMO+1       | -1.246      | 06            | 02             | 92  |
| LUMO         | -1.259      | 05            | 02             | 93  |
| HOMO         | -3.972      | 15            | 83             | 02  |
| HOMO-1       | -4.431      | 68            | 22             | 10  |
| HOMO-2       | -4.444      | 66            | 24             | 10  |
| HOMO-3       | -4.771      | 79            | 09             | 12  |
| HOMO-4       | -4.801      | 75            | 09             | 16  |
| HOMO-5       | -4.877      | 79            | 08             | 13  |

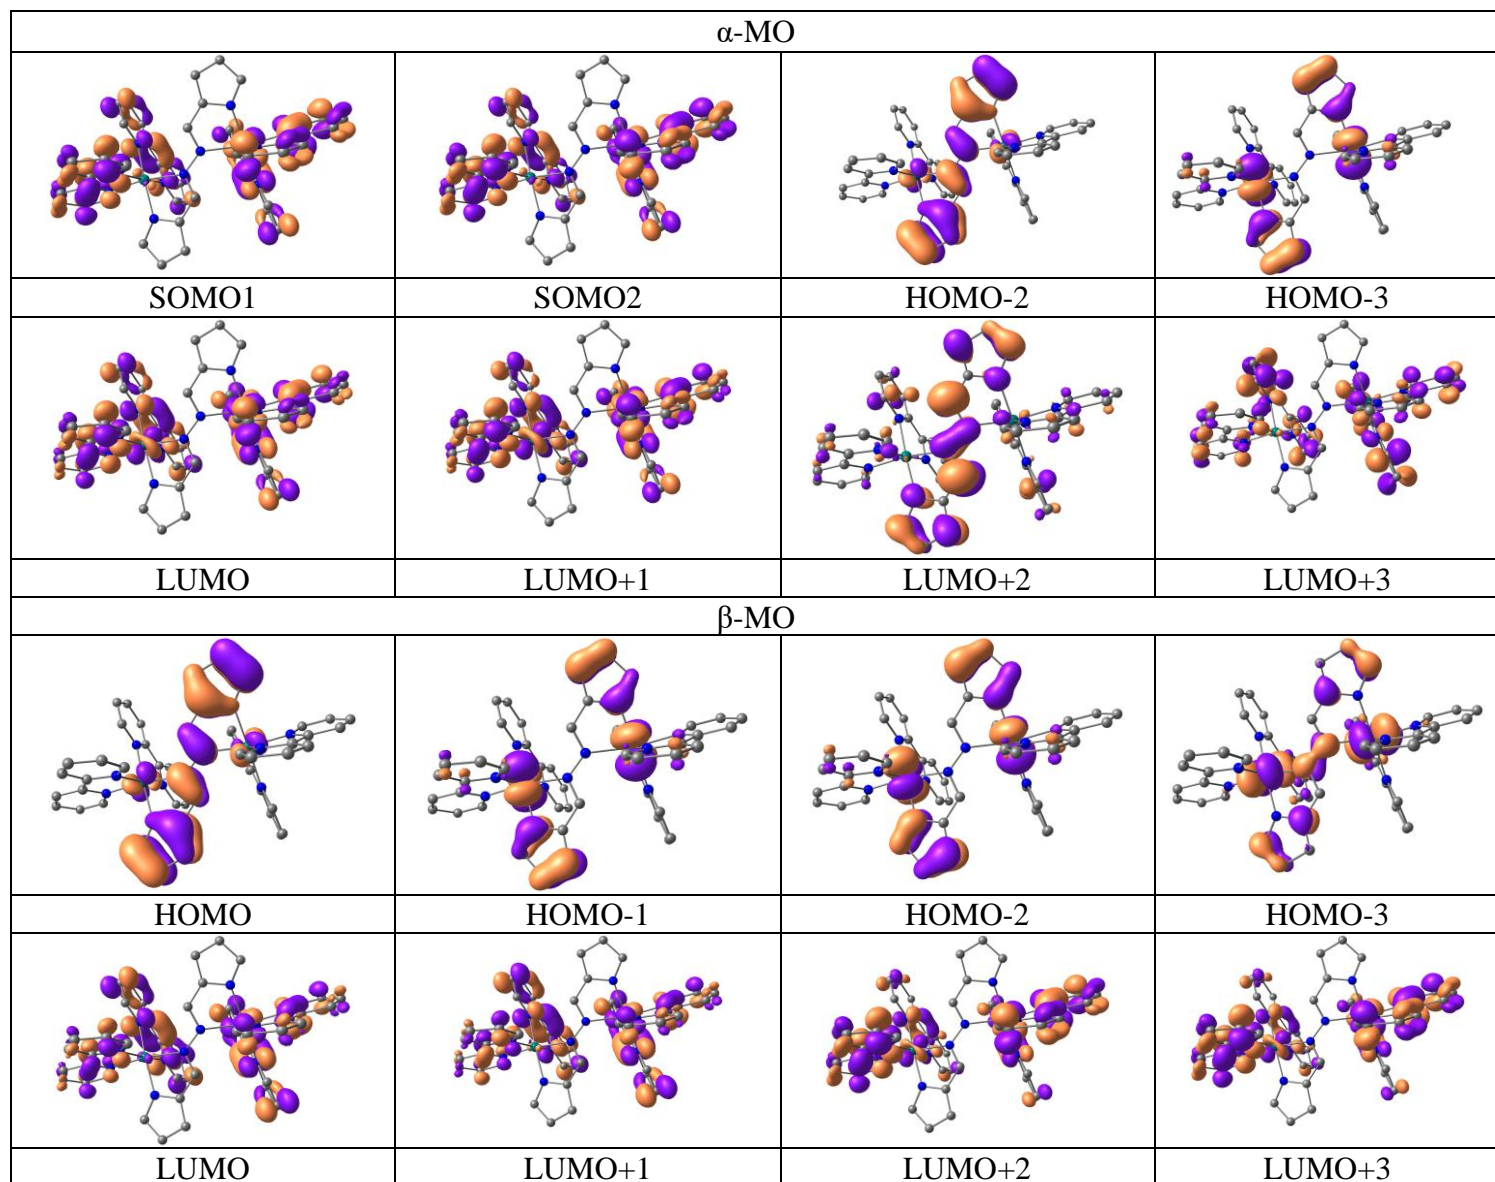

**Table S21** DFT calculated MO composition for **3a<sup>3+</sup>** in  $S = 1/2$  state

| MO           | Energy (eV) | % Composition |                |     |
|--------------|-------------|---------------|----------------|-----|
|              |             | Ru            | L <sup>-</sup> | pap |
| $\alpha$ -MO |             |               |                |     |
| LUMO+5       | -8.081      | 06            | 26             | 68  |
| LUMO+4       | -9.082      | 04            | 92             | 04  |
| LUMO+3       | -9.676      | 12            | 02             | 86  |
| LUMO+2       | -9.691      | 11            | 02             | 87  |
| LUMO+1       | -9.838      | 09            | 03             | 88  |
| LUMO         | -9.885      | 10            | 03             | 87  |
| SOMO         | -12.594     | 38            | 53             | 09  |
| HOMO-1       | -12.705     | 60            | 21             | 19  |
| HOMO-2       | -12.766     | 45            | 42             | 13  |
| HOMO-3       | -13.009     | 28            | 06             | 66  |
| HOMO-4       | -13.035     | 08            | 09             | 83  |
| HOMO-5       | -13.169     | 05            | 00             | 95  |
| $\beta$ -MO  |             |               |                |     |
| LUMO+5       | -8.936      | 04            | 92             | 04  |
| LUMO+4       | -9.675      | 13            | 02             | 85  |
| LUMO+3       | -9.690      | 11            | 02             | 87  |
| LUMO+2       | -9.836      | 09            | 03             | 88  |
| LUMO+1       | -9.882      | 10            | 03             | 87  |
| LUMO         | -11.187     | 08            | 90             | 02  |
| HOMO         | -12.640     | 62            | 21             | 17  |
| HOMO-1       | -12.672     | 60            | 22             | 18  |
| HOMO-2       | -12.960     | 46            | 18             | 36  |
| HOMO-3       | -13.010     | 20            | 08             | 72  |
| HOMO-4       | -13.113     | 12            | 38             | 50  |
| HOMO-5       | -13.169     | 03            | 01             | 96  |



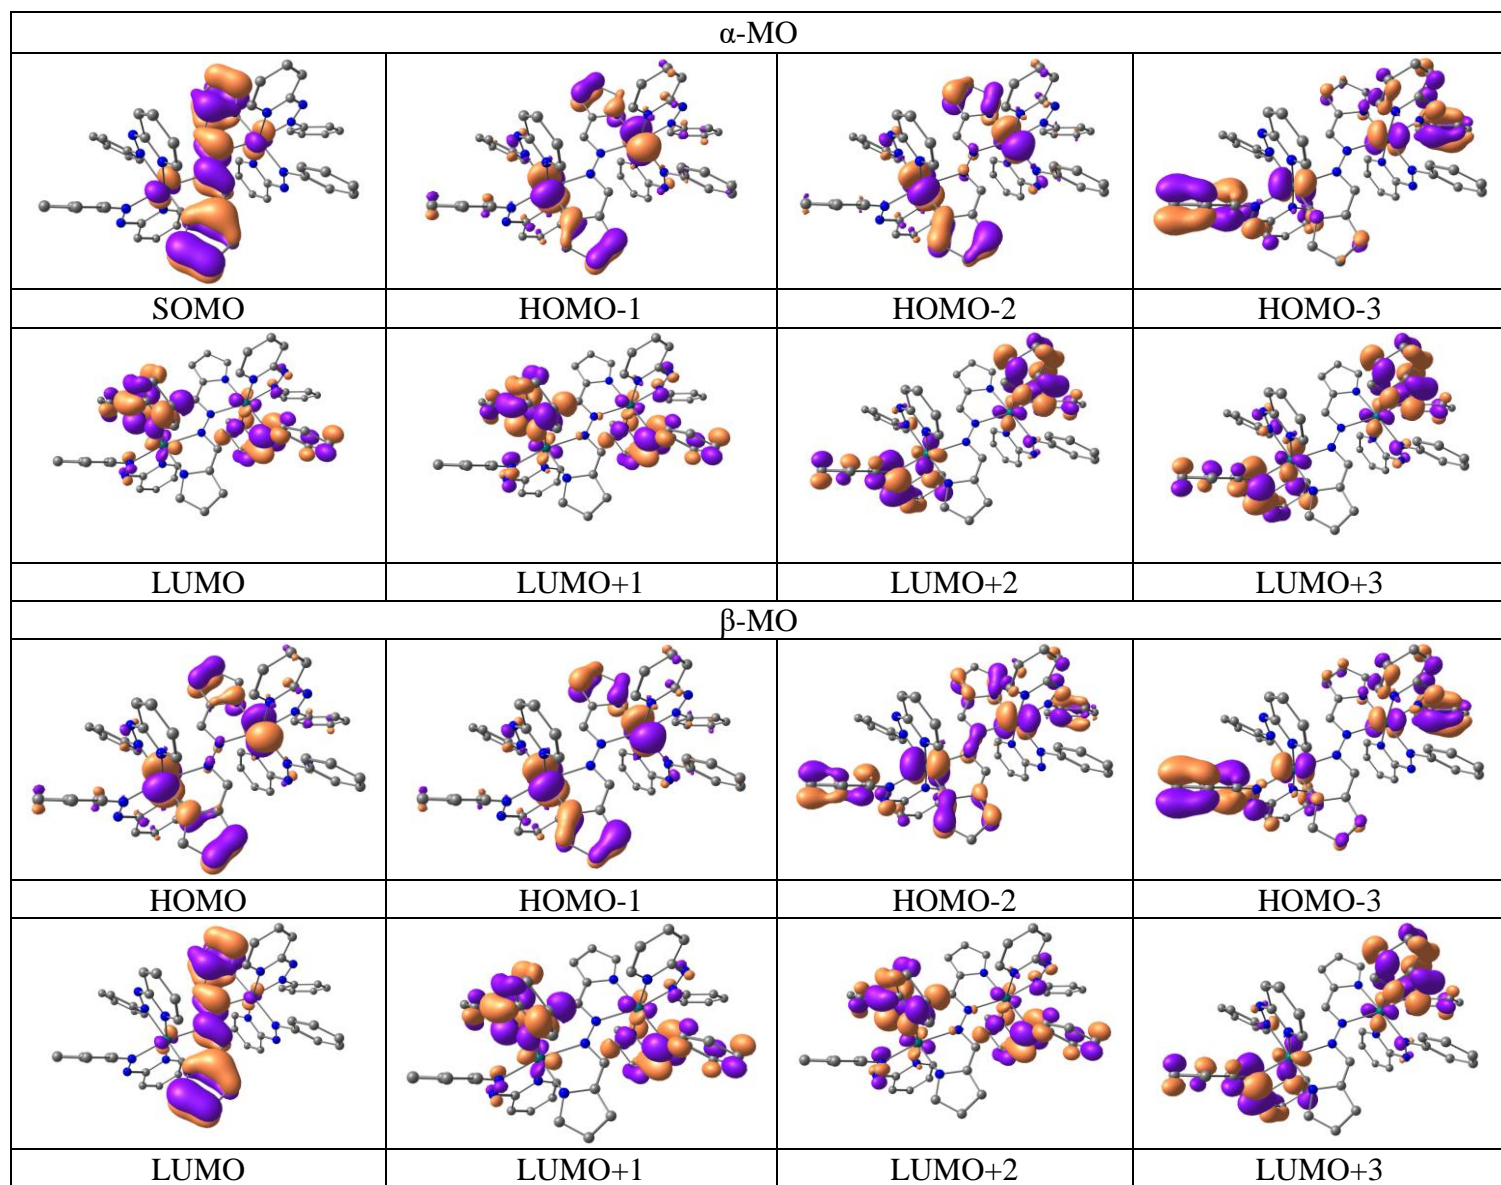

**Table S22** DFT calculated MO composition for **3a<sup>2+</sup>** in  $S = 0$  state

| MO     | Energy (eV) | % Composition |                |     |
|--------|-------------|---------------|----------------|-----|
|        |             | Ru            | L <sup>-</sup> | pap |
| LUMO+5 | -5.941      | 05            | 02             | 93  |
| LUMO+4 | -6.113      | 04            | 61             | 35  |
| LUMO+3 | -7.394      | 17            | 03             | 80  |
| LUMO+2 | -7.477      | 13            | 03             | 84  |
| LUMO+1 | -7.534      | 12            | 02             | 86  |
| LUMO   | -7.543      | 14            | 02             | 84  |
| HOMO   | -9.261      | 06            | 92             | 02  |
| HOMO-1 | -10.001     | 42            | 44             | 14  |
| HOMO-2 | -10.008     | 42            | 43             | 15  |
| HOMO-3 | -10.414     | 11            | 83             | 06  |
| HOMO-4 | -10.867     | 53            | 14             | 33  |
| HOMO-5 | -10.877     | 60            | 10             | 30  |

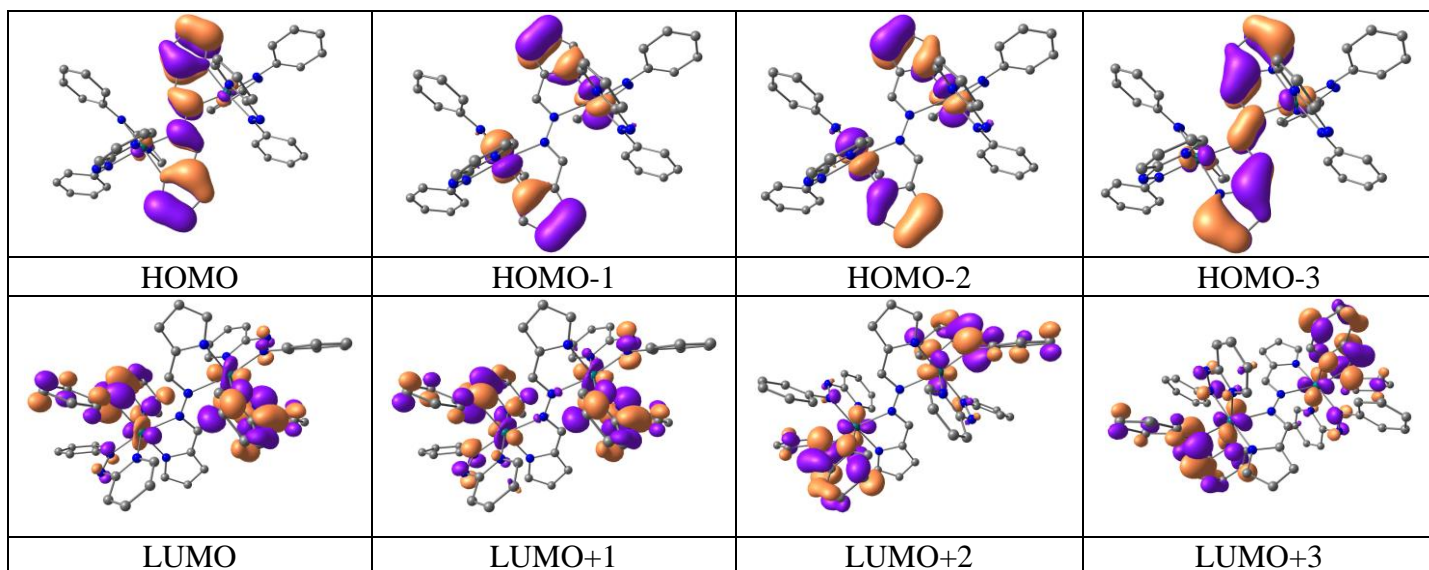

**Table S23** DFT calculated MO composition for **3a<sup>+</sup>** in  $S = 1/2$  state

| MO           | Energy (eV) | % Composition |                |     |
|--------------|-------------|---------------|----------------|-----|
|              |             | Ru            | L <sup>-</sup> | pap |
| $\alpha$ -MO |             |               |                |     |
| LUMO+5       | -3.340      | 03            | 01             | 96  |
| LUMO+4       | -3.346      | 05            | 02             | 93  |
| LUMO+3       | -3.471      | 05            | 87             | 08  |
| LUMO+2       | -5.006      | 19            | 02             | 79  |
| LUMO+1       | -5.037      | 18            | 02             | 80  |
| LUMO         | -5.317      | 08            | 03             | 89  |
| SOMO         | -5.716      | 09            | 02             | 89  |
| HOMO-1       | -6.705      | 06            | 91             | 03  |
| HOMO-2       | -7.457      | 53            | 36             | 11  |
| HOMO-3       | -7.466      | 52            | 36             | 12  |
| HOMO-4       | -7.909      | 28            | 65             | 07  |
| HOMO-5       | -8.098      | 60            | 20             | 20  |
| $\beta$ -MO  |             |               |                |     |
| LUMO+5       | -3.326      | 05            | 02             | 93  |
| LUMO+4       | -3.468      | 05            | 88             | 07  |
| LUMO+3       | -4.597      | 11            | 03             | 86  |
| LUMO+2       | -4.649      | 11            | 02             | 87  |
| LUMO+1       | -4.924      | 11            | 02             | 87  |
| LUMO         | -4.931      | 11            | 02             | 87  |
| HOMO         | -6.705      | 06            | 91             | 02  |
| HOMO-1       | -7.451      | 53            | 36             | 11  |
| HOMO-2       | -7.455      | 53            | 35             | 12  |
| HOMO-3       | -7.899      | 32            | 60             | 08  |
| HOMO-4       | -8.086      | 56            | 23             | 22  |
| HOMO-5       | -8.096      | 65            | 11             | 24  |

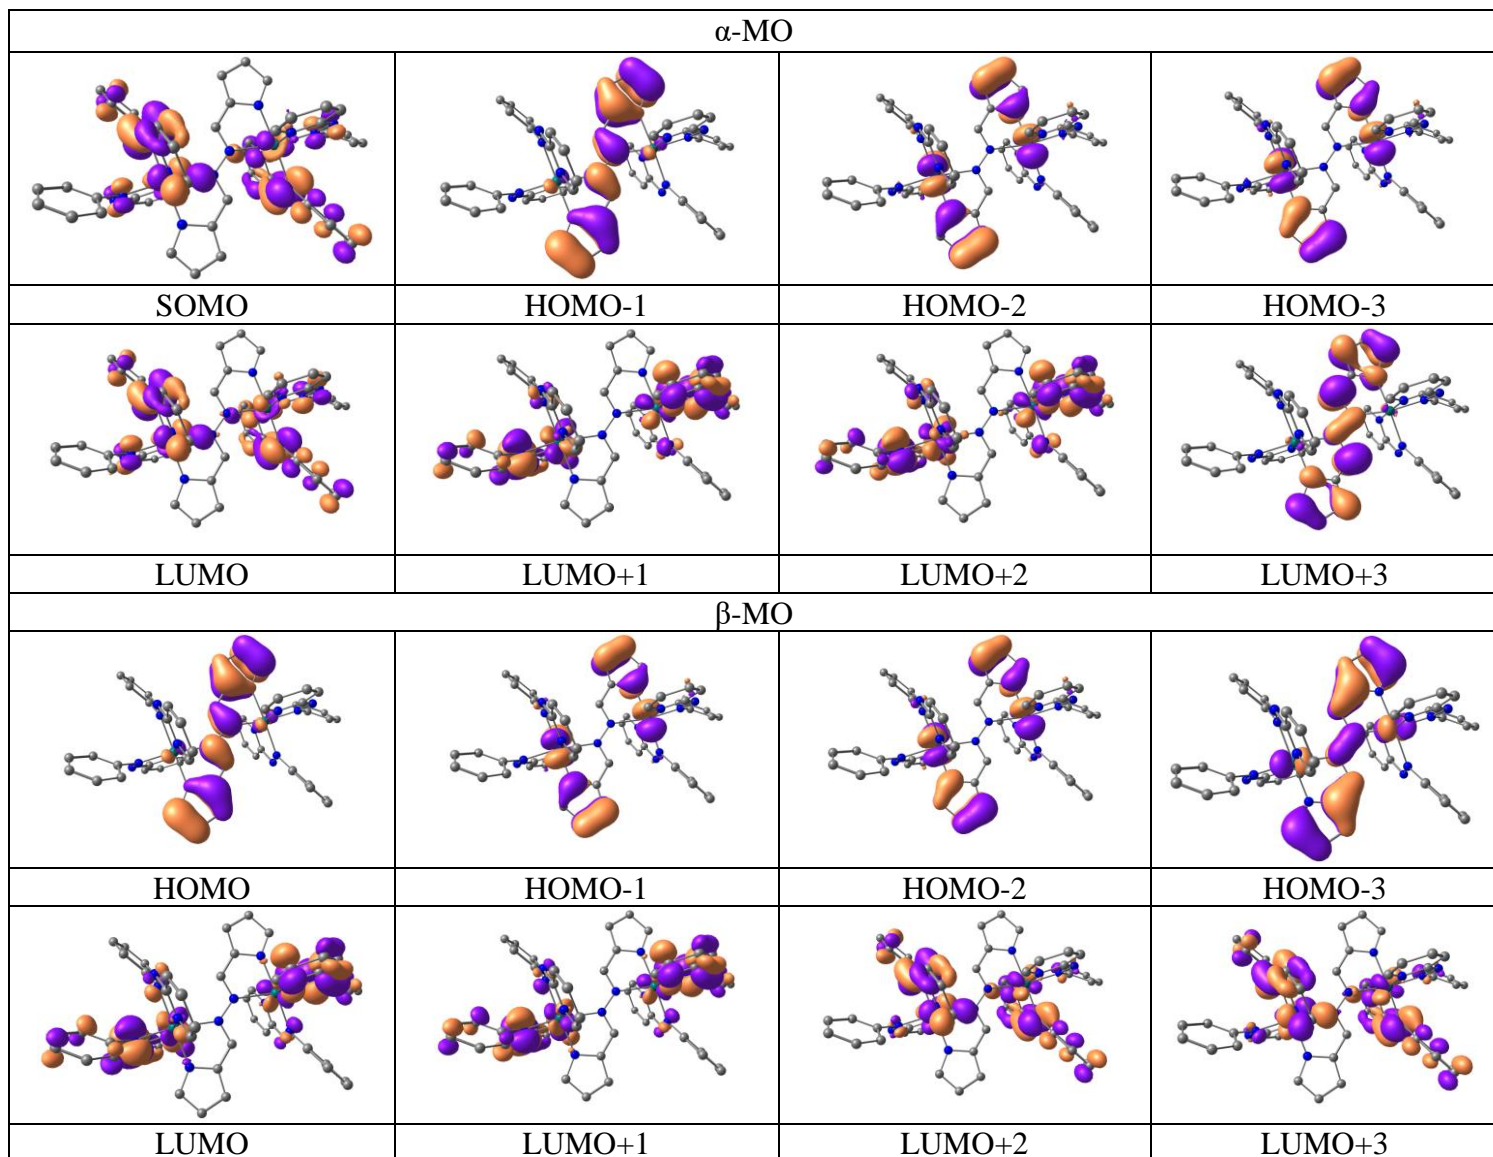

**Table S24** DFT calculated MO composition for **3a<sup>0</sup>** in  $S = 1$  state

| MO           | Energy (eV) | % Composition |                |     |
|--------------|-------------|---------------|----------------|-----|
|              |             | Ru            | L <sup>-</sup> | pap |
| $\alpha$ -MO |             |               |                |     |
| LUMO+5       | -0.854      | 04            | 02             | 94  |
| LUMO+4       | -0.923      | 05            | 02             | 93  |
| LUMO+3       | -0.924      | 04            | 01             | 95  |
| LUMO+2       | -1.158      | 05            | 89             | 06  |
| LUMO+1       | -2.607      | 23            | 02             | 75  |
| LUMO         | -2.662      | 22            | 02             | 76  |
| SOMO1        | -3.540      | 08            | 03             | 90  |
| SOMO2        | -3.564      | 08            | 02             | 90  |
| HOMO-2       | -4.410      | 08            | 89             | 03  |
| HOMO-3       | -5.049      | 61            | 27             | 12  |
| HOMO-4       | -5.061      | 59            | 29             | 12  |
| HOMO-5       | -5.520      | 61            | 26             | 13  |
| $\beta$ -MO  |             |               |                |     |
| LUMO+5       | -0.852      | 06            | 01             | 93  |
| LUMO+4       | -1.151      | 05            | 89             | 06  |
| LUMO+3       | -2.022      | 11            | 03             | 86  |
| LUMO+2       | -2.072      | 10            | 03             | 87  |
| LUMO+1       | -2.195      | 10            | 02             | 87  |
| LUMO         | -2.202      | 10            | 02             | 87  |
| HOMO         | -4.411      | 08            | 89             | 03  |
| HOMO-1       | -5.039      | 60            | 28             | 12  |
| HOMO-2       | -5.040      | 59            | 28             | 13  |
| HOMO-3       | -5.481      | 66            | 20             | 14  |
| HOMO-4       | -5.610      | 67            | 11             | 22  |
| HOMO-5       | -5.689      | 30            | 53             | 17  |

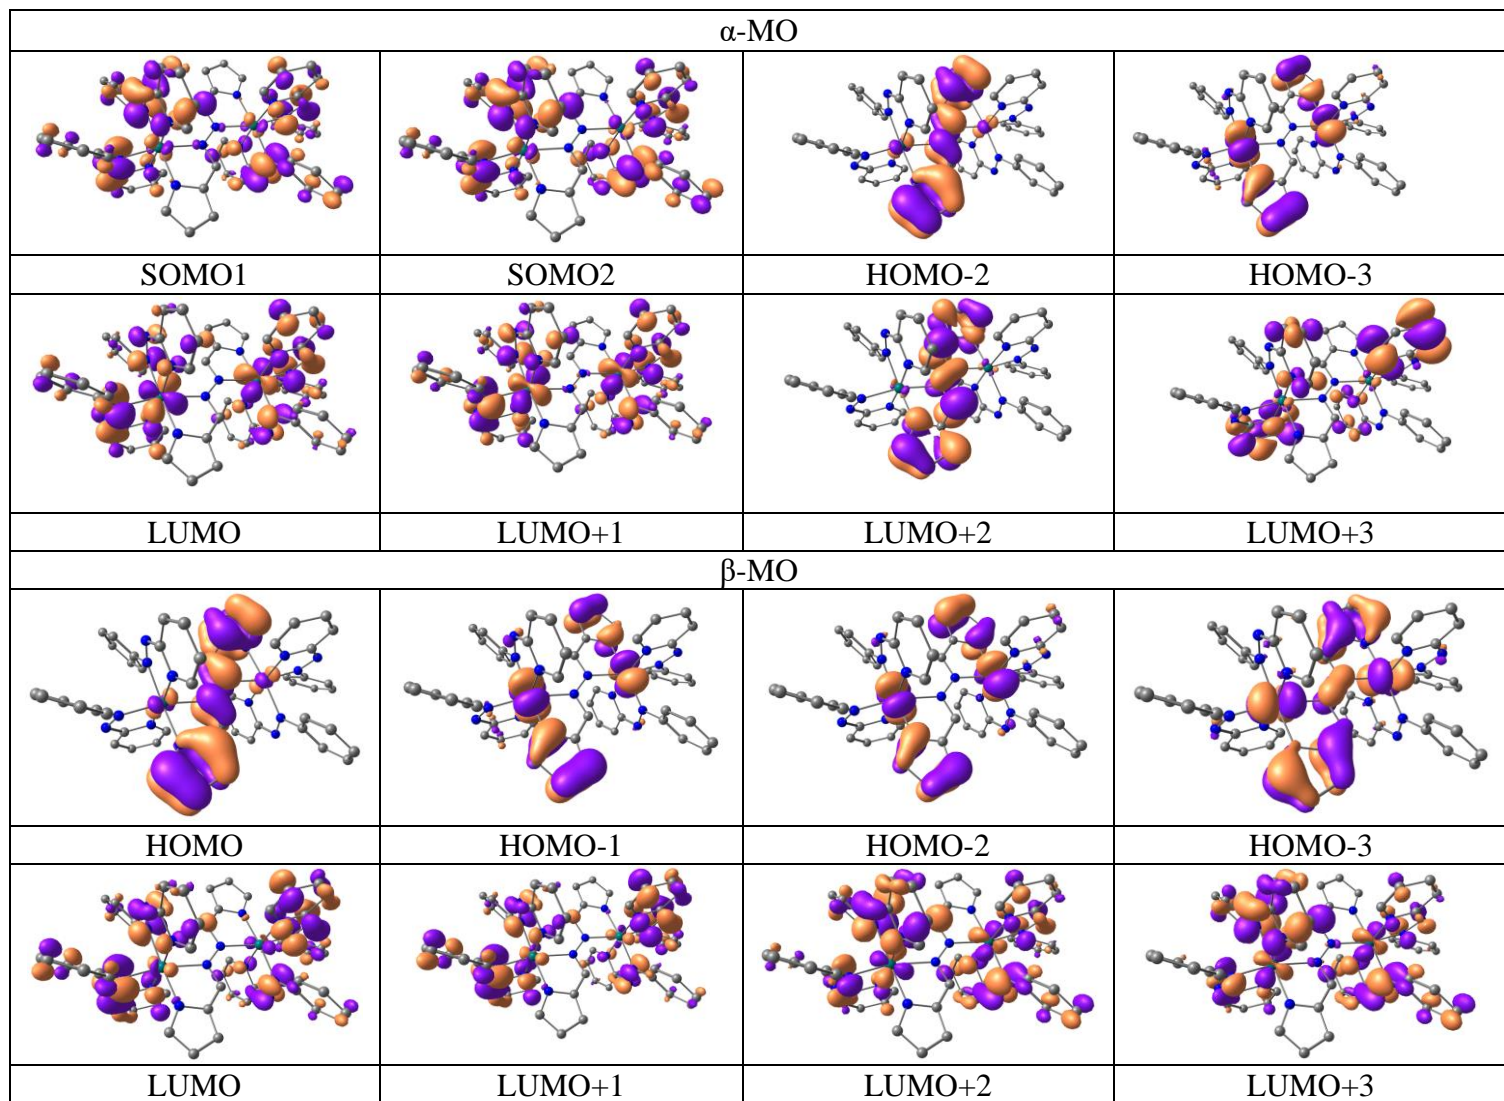

**Table S25** DFT calculated MO composition for **3b<sup>3+</sup>** in  $S = 1/2$  state

| MO           | Energy (eV) | % Composition |                |     |
|--------------|-------------|---------------|----------------|-----|
|              |             | Ru            | L <sup>-</sup> | pap |
| $\alpha$ -MO |             |               |                |     |
| LUMO+5       | -8.282      | 18            | 62             | 20  |
| LUMO+4       | -9.120      | 05            | 88             | 07  |
| LUMO+3       | -9.716      | 13            | 02             | 85  |
| LUMO+2       | -9.737      | 12            | 03             | 85  |
| LUMO+1       | -9.927      | 08            | 02             | 90  |
| LUMO         | -9.973      | 08            | 04             | 88  |
| SOMO         | -12.722     | 33            | 60             | 07  |
| HOMO-1       | -12.827     | 60            | 22             | 18  |
| HOMO-2       | -12.856     | 51            | 32             | 17  |
| HOMO-3       | -13.004     | 26            | 07             | 67  |
| HOMO-4       | -13.089     | 10            | 11             | 79  |
| HOMO-5       | -13.149     | 01            | 00             | 99  |
| $\beta$ -MO  |             |               |                |     |
| LUMO+5       | -8.986      | 04            | 70             | 06  |
| LUMO+4       | -9.714      | 14            | 02             | 84  |
| LUMO+3       | -9.735      | 12            | 03             | 85  |
| LUMO+2       | -9.923      | 09            | 02             | 89  |
| LUMO+1       | -9.965      | 09            | 03             | 88  |
| LUMO         | -11.306     | 09            | 88             | 03  |
| HOMO         | -12.755     | 59            | 25             | 15  |
| HOMO-1       | -12.799     | 59            | 23             | 18  |
| HOMO-2       | -12.908     | 47            | 26             | 27  |
| HOMO-3       | -13.038     | 15            | 07             | 77  |
| HOMO-4       | -13.137     | 14            | 12             | 73  |
| HOMO-5       | -13.150     | 03            | 02             | 94  |



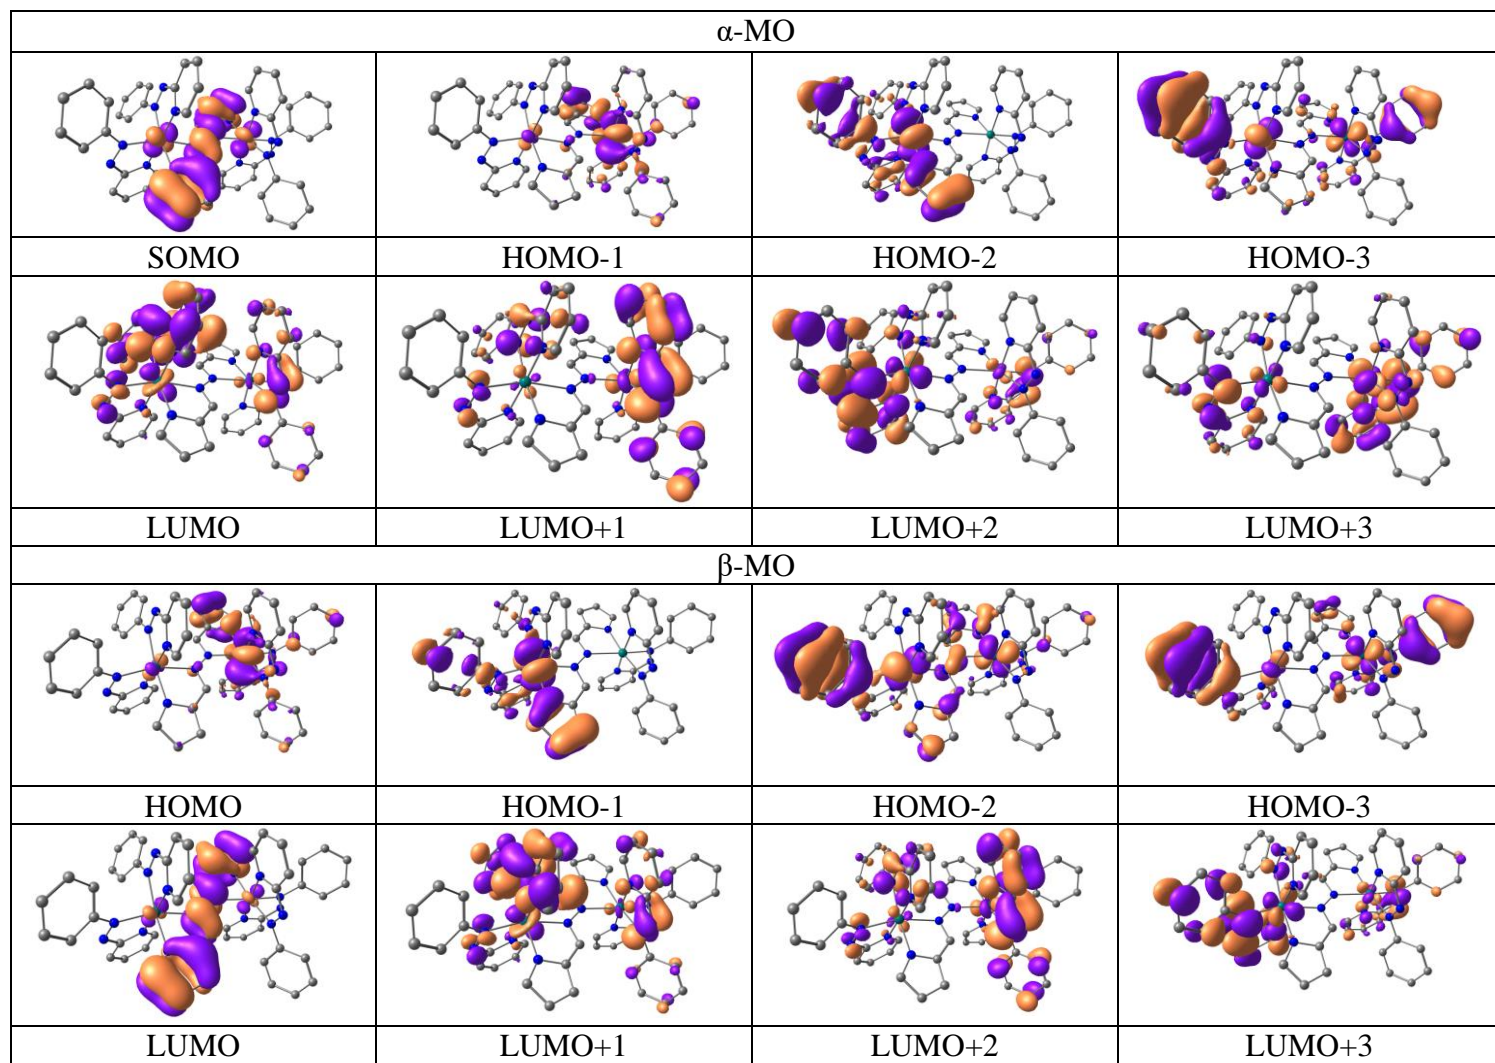

**Table S26** DFT calculated MO composition for **3b**<sup>2+</sup> in *S* = 0 state

| MO     | Energy (eV) | % Composition |                |     |
|--------|-------------|---------------|----------------|-----|
|        |             | Ru            | L <sup>-</sup> | pap |
| LUMO+5 | -6.051      | 03            | 10             | 87  |
| LUMO+4 | -6.086      | 06            | 70             | 24  |
| LUMO+3 | -7.306      | 19            | 03             | 78  |
| LUMO+2 | -7.390      | 19            | 03             | 78  |
| LUMO+1 | -7.639      | 08            | 02             | 90  |
| LUMO   | -7.776      | 09            | 03             | 88  |
| HOMO   | -9.426      | 08            | 87             | 05  |
| HOMO-1 | -10.069     | 41            | 49             | 09  |
| HOMO-2 | -10.127     | 47            | 41             | 12  |
| HOMO-3 | -10.316     | 19            | 68             | 13  |
| HOMO-4 | -10.864     | 69            | 09             | 22  |
| HOMO-5 | -10.922     | 64            | 07             | 29  |

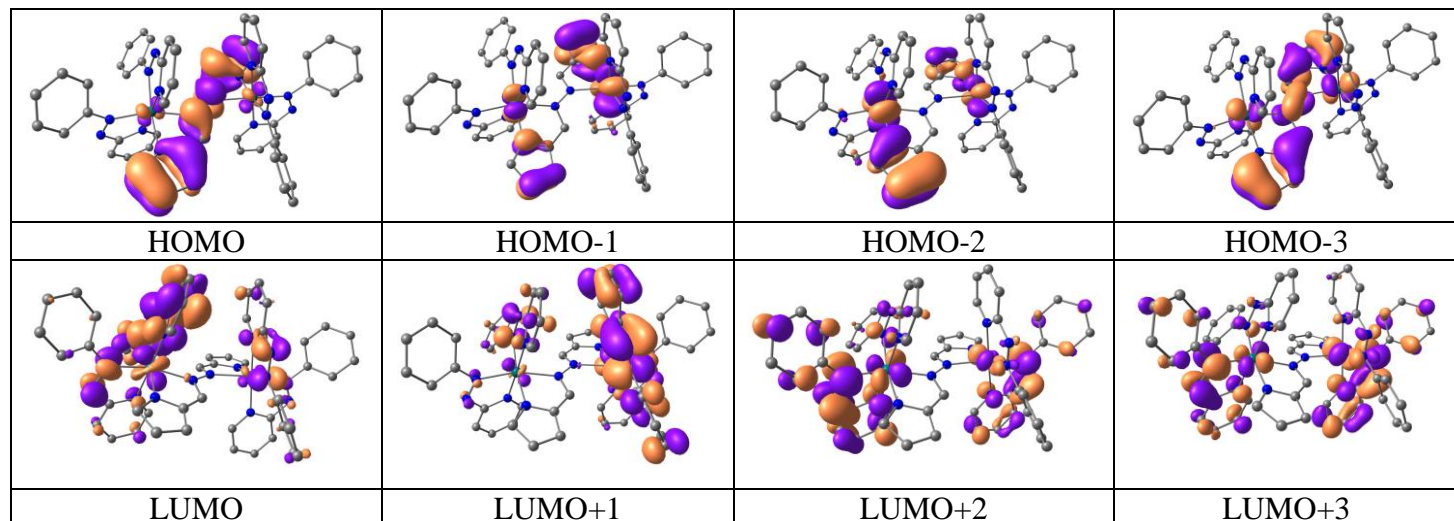

**Table S27** DFT calculated MO composition for **3b<sup>+</sup>** in  $S = 1/2$  state

| MO           | Energy (eV) | % Composition |                |     |
|--------------|-------------|---------------|----------------|-----|
|              |             | Ru            | L <sup>-</sup> | pap |
| $\alpha$ -MO |             |               |                |     |
| LUMO+5       | -3.308      | 04            | 02             | 94  |
| LUMO+4       | -3.383      | 05            | 04             | 91  |
| LUMO+3       | -3.490      | 05            | 84             | 11  |
| LUMO+2       | -4.983      | 19            | 02             | 79  |
| LUMO+1       | -5.028      | 18            | 02             | 80  |
| LUMO         | -5.321      | 08            | 02             | 90  |
| SOMO         | -5.754      | 09            | 02             | 89  |
| HOMO-1       | -6.784      | 07            | 90             | 03  |
| HOMO-2       | -7.515      | 52            | 38             | 10  |
| HOMO-3       | -7.546      | 52            | 38             | 10  |
| HOMO-4       | -7.831      | 30            | 58             | 12  |
| HOMO-5       | -8.108      | 69            | 07             | 24  |
| $\beta$ -MO  |             |               |                |     |
| LUMO+5       | -3.358      | 05            | 04             | 91  |
| LUMO+4       | -3.477      | 06            | 83             | 11  |
| LUMO+3       | -4.636      | 12            | 02             | 86  |
| LUMO+2       | -4.683      | 11            | 02             | 87  |
| LUMO+1       | -4.860      | 11            | 02             | 87  |
| LUMO         | -4.926      | 12            | 02             | 86  |
| HOMO         | -6.781      | 07            | 90             | 03  |
| HOMO-1       | -7.500      | 53            | 37             | 10  |
| HOMO-2       | -7.541      | 53            | 37             | 10  |
| HOMO-3       | -7.810      | 34            | 54             | 12  |
| HOMO-4       | -8.099      | 65            | 09             | 26  |
| HOMO-5       | -8.141      | 66            | 09             | 25  |

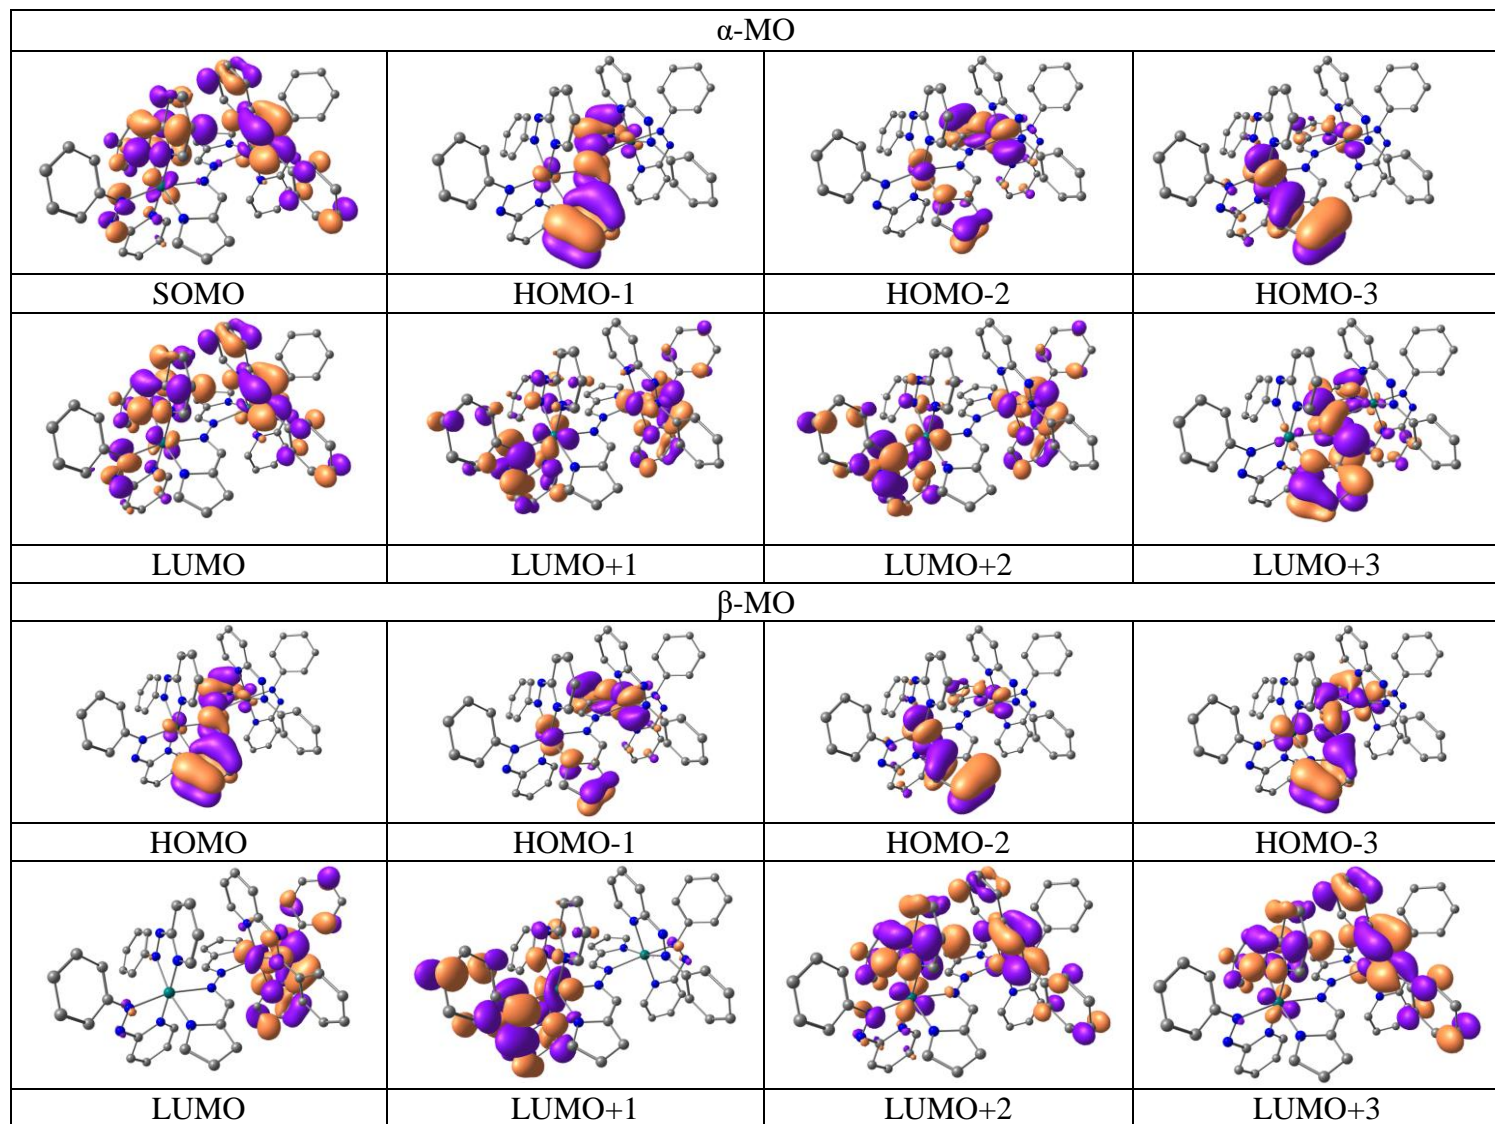

**Table S28** DFT calculated MO composition for **3b<sup>0</sup>** in  $S = 1$  state

| MO           | Energy (eV) | % Composition |                |     |
|--------------|-------------|---------------|----------------|-----|
|              |             | Ru            | L <sup>-</sup> | pap |
| $\alpha$ -MO |             |               |                |     |
| LUMO+5       | -0.834      | 04            | 01             | 95  |
| LUMO+4       | -0.888      | 05            | 01             | 94  |
| LUMO+3       | -0.903      | 05            | 02             | 93  |
| LUMO+2       | -1.142      | 06            | 86             | 08  |
| LUMO+1       | -2.585      | 24            | 02             | 74  |
| LUMO         | -2.626      | 22            | 03             | 75  |
| SOMO1        | -3.528      | 08            | 02             | 90  |
| SOMO2        | -3.573      | 09            | 02             | 89  |
| HOMO-2       | -4.454      | 10            | 87             | 03  |
| HOMO-3       | -5.079      | 62            | 28             | 10  |
| HOMO-4       | -5.117      | 58            | 31             | 11  |
| HOMO-5       | -5.416      | 46            | 37             | 17  |
| $\beta$ -MO  |             |               |                |     |
| LUMO+5       | -0.821      | 05            | 02             | 93  |
| LUMO+4       | -1.122      | 06            | 85             | 09  |
| LUMO+3       | -2.064      | 11            | 02             | 87  |
| LUMO+2       | -2.092      | 12            | 02             | 86  |
| LUMO+1       | -2.119      | 10            | 03             | 87  |
| LUMO         | -2.140      | 09            | 03             | 88  |
| HOMO         | -4.452      | 10            | 87             | 03  |
| HOMO-1       | -5.066      | 61            | 29             | 10  |
| HOMO-2       | -5.079      | 60            | 30             | 10  |
| HOMO-3       | -5.375      | 55            | 29             | 16  |
| HOMO-4       | -5.591      | 61            | 15             | 24  |
| HOMO-5       | -5.598      | 66            | 09             | 25  |

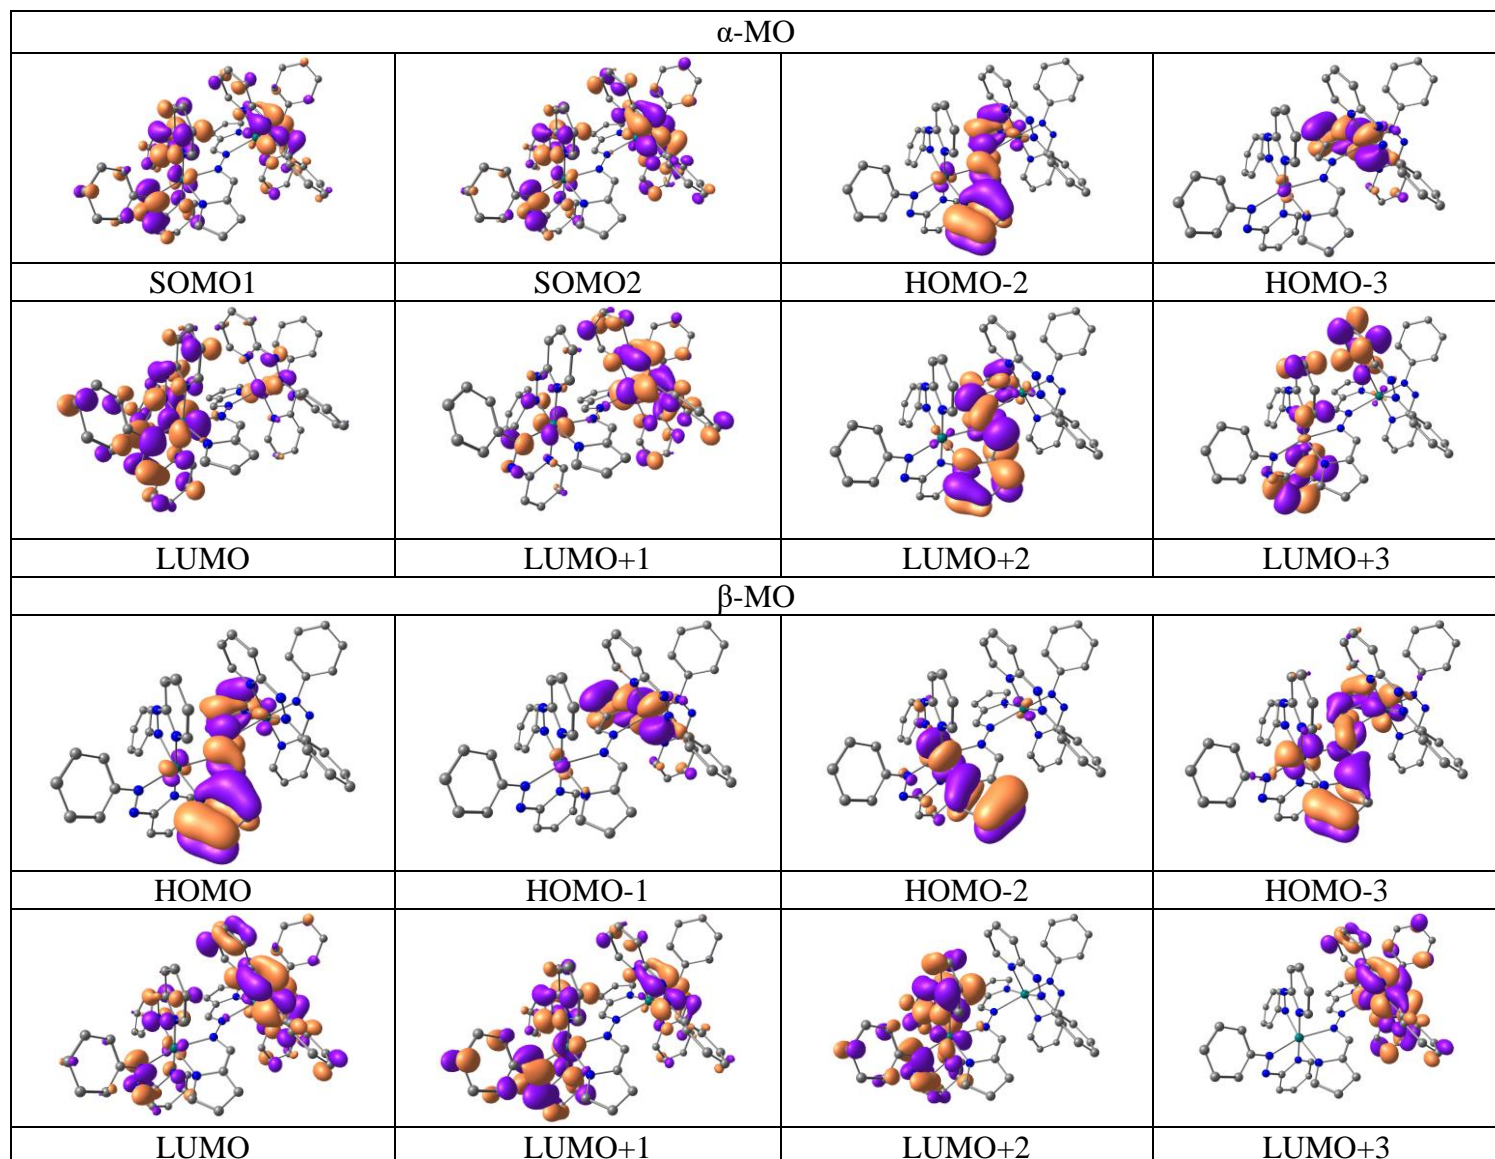

Supplement: d1dt01488a1.pdf [file d1dt01488a1.pdf]
